# Supplementary material
Source: ML conference proceedings conference paper supplement (https://proceedings.mlr.press/v180/yang22a.html)
Supplement: Supplementary file [file yang22a-supp.pdf]

# Appendix for "Differentially Private SGDA for Minimax Problems"

## A Motivating Examples

We provide several examples that can be formulated as a stochastic minimax problem. All these examples have corresponding empirical minimax formulations.

**AUC Maximization.** Area Under the ROC Curve (AUC) is a widely used measure for binary classification. Optimizing AUC with square loss can be formulated as

$$\min_{\theta \in \Theta} \mathbb{E}_{\mathbf{z}, \mathbf{z}'} [(1 - h(\theta; \mathbf{x}) + h(\theta; \mathbf{x}'))^2 | y = 1, y' = -1]$$

where  $h : \Theta \times \mathbb{R}^d \rightarrow \mathbb{R}$  is the scoring function for the classifier. It has been shown this problem is equivalent to a minimax problem once auxiliary variables  $a, b, \mathbf{v} \in \mathbb{R}$  are introduced [Ying et al., 2016].

$$\min_{\theta, a, b} \max_{\mathbf{v}} F(\theta, a, b, c) = \mathbb{E}_{\mathbf{z}} [f(\theta, a, b, \mathbf{v}; \mathbf{z})]$$

where  $f = (1 - p)(h(\theta; \mathbf{x}) - a)^2 \mathbb{I}[y = 1] + p(h(\theta; \mathbf{x}) - b)^2 \mathbb{I}[y = -1] + 2(1 + \mathbf{v})(ph(\theta; \mathbf{x}) \mathbb{I}[y = -1] - (1 - p)h(\theta; \mathbf{x}) \mathbb{I}[y = 1]) - p(1 - p)\mathbf{v}^2$  and  $p = \mathbb{P}[y = 1]$ . Such problem is (non)convex-concave. In particular, Liu et al. [2020] showed that when  $h$  is a one hidden layer neural network the objective  $f$  satisfies the Polyak-Łojasiewicz condition. Differential privacy has been applied to learn private classifier by optimizing AUC [Wang et al., 2021]. The proposed privacy mechanisms there are objective perturbation and output perturbation.

**Generative Adversarial Networks (GANs).** GAN is introduced in Goodfellow et al. [2014] which can be regarded as a game between a generator network  $G_{\mathbf{v}}$  and a discriminator network  $D_{\mathbf{w}}$ . The generator network produces synthetic data from random noise  $\xi$ , while the discriminator network discriminates between the true data and the synthetic data. In particular, a popular variant of GAN named as WGAN [Arjovsky et al., 2017] can be written as a minimax problem

$$\min_{\mathbf{w}} \max_{\mathbf{v}} \mathbb{E}[f(\mathbf{w}, \mathbf{v}; \mathbf{z}, \xi)] := \mathbb{E}_{\mathbf{z}} [D_{\mathbf{w}}(\mathbf{z})] - \mathbb{E}_{\xi} [D_{\mathbf{w}}(G_{\mathbf{v}}(\xi))].$$

Recently Sahiner et al. [2021] showed that WGAN with a two-layer discriminator and generator can be expressed as a convex-concave problem. An heuristic differentially private version of RMSProp were employed to train GANs by Xie et al. [2018]. Recently differential privacy has successfully applied to private synthetic data generation by GAN framework [Jordon et al., 2018, Beaulieu-Jones et al., 2019].

**Markov Decision Process (MDP).** Let  $\mathcal{A}$  be a finite action space. For any  $a \in \mathcal{A}$ ,  $P(a) \in [0, 1]^{n \times n}$  is the state-transition probability matrix and  $\mathbf{r}(a) \in [0, 1]^n$  is the vector of expected state-transition rewards. In the infinite-horizon average-reward Markov decision problem, one aims to find a stationary policy  $\pi$  to make an infinite sequence of actions and optimize the average-per-time-step reward  $\bar{v}$ . By classical theory of dynamics programming [Puterman, 2014], finding an optimal policy is equivalent as solving the fixed-point Bellman equation

$$\bar{v}^* + \mathbf{h}_i^* = \max_{a \in \mathcal{A}} \left\{ \sum_{j=1}^n (p_{ij}(a) \mathbf{h}_j^* + p_{ij}(a) r_{ij}(a)) \right\}, \quad \forall i$$

where  $\mathbf{h} \in \mathbb{R}^n$  is the difference-of-value vector. Wang [2017] showed that this problem is equivalent to the minimax problem as follow

$$\min_{\mathbf{h} \in \mathcal{H}} \max_{\mu \in \mathcal{U}} \mu^\top ((P(a) - I)\mathbf{h} + \mathbf{r}(a))$$

where  $\mathcal{H}$  and  $\mathcal{U}$  are the feasible regions chosen according to the mixing time and stationary distribution. We refer to Zhang et al. [2021] for a discussion on the measure of population risk.

**Robust Optimization and Fairness.** Let  $\mathcal{D}_1, \dots, \mathcal{D}_m$  be  $m$  different distributions on some support. The aim is to minimize the worst population risks  $L$  parameterized by some  $\mathbf{w}$  among multiple scenarios:

$$\min_{\mathbf{w} \in \mathcal{W}} L(\mathbf{w}) = \max_{1 \leq i \leq m} \left\{ \mathbb{E}_{\mathbf{z}_1 \sim \mathcal{D}_1} [\ell(\mathbf{w}; \mathbf{z}_1)], \dots, \mathbb{E}_{\mathbf{z}_m \sim \mathcal{D}_m} [\ell(\mathbf{w}; \mathbf{z}_m)] \right\}$$

This problem can be reformulated as a zero-sum game between two players  $\mathbf{w}$  and  $\mathbf{v}$  as follow

$$\min_{\mathbf{w} \in \mathcal{W}} \max_{\mathbf{v} \in \Delta_m} \sum_{i=1}^m v_i \mathbb{E}_{\mathbf{z}_i \sim \mathcal{D}_i} [\ell(\mathbf{w}; \mathbf{z}_i)] = \mathbb{E} \left[ \sum_{i=1}^m v_i \ell(\mathbf{w}; \mathbf{z}_i) \right]$$

where  $\Delta_m = \{\mathbf{v} \in \mathbb{R}^m : v_i \geq 0, \sum_{i=1}^m v_i = 1\}$  denotes the  $m$ -dimensional simplex. Such robust optimization formulation has been recently proposed to address fairness among subgroups [Mohri et al., 2019] and federated learning on heterogeneous populations [Li et al., 2019].

## B Proofs of Theorem 1 and Remark 1

In this section, we prove the privacy guarantee of DP-SGDA based on the privacy-amplification by the subsampling result, which is a direct application of Theorem 1 in Abadi et al. [2016]. First we introduce some necessary definitions.

**Definition 1.** Given a function  $g : \mathcal{Z}^n \rightarrow \mathbb{R}^d$ , we say  $g$  has  $\Delta(g)$   $\ell_2$ -sensitivity if for any neighboring datasets  $S, S'$  we have

$$\|g(S) - g(S')\|_2 \leq \Delta(g).$$

**Definition 2** ([Abadi et al., 2016]). For an (randomized) algorithm  $A$ , and neighboring datasets  $S, S'$  the  $\lambda$ -th moment is given as

$$\alpha_A(\lambda, S, S') = \log \mathbb{E}_{O \sim A(S)} \left[ \left( \frac{\mathbb{P}[A(S) = O]}{\mathbb{P}[A(S') = O]} \right)^\lambda \right].$$

The moments accountant is then defined as

$$\alpha_A(\lambda) = \sup_{S, S'} \alpha_A(\lambda, S, S').$$

**Lemma 1** ([Abadi et al., 2016]). Consider a sequence of mechanisms  $\{A_t\}_{t \in [T]}$  and the composite mechanism  $A = (A_1, \dots, A_T)$ .

a) [Composability] For any  $\lambda$ ,

$$\alpha_A(\lambda) = \sum_{t=1}^T \alpha_{A_t}(\lambda).$$

b) [Tail bound] For any  $\epsilon$ , the mechanism  $A$  is  $(\epsilon, \delta)$  differentially private for

$$\delta = \min_{\lambda} \alpha_A(\lambda) - \lambda \epsilon.$$

**Lemma 2** ([Abadi et al., 2016]). Consider a sequence of mechanisms  $A_t = g_t(S_t) + \xi_t$  where  $\xi \sim \mathcal{N}(0, \sigma^2 I)$ . Here each function  $g_t : \mathcal{Z}^m \rightarrow \mathbb{R}^d$  has  $\ell_2$ -sensitivity of 1. And each  $S_t$  is a subsample of size  $m$  obtained by uniform sampling without replacement<sup>1</sup> from  $S$ , i.e.  $S_t \sim (\text{Unif}(S))^m$ , Then

$$\alpha_A(\lambda) \leq \frac{m^2 n \lambda (\lambda + 1)}{n^2 (n - m) \sigma^2} + \mathcal{O}\left(\frac{m^3 \lambda^3}{n^3 \sigma^3}\right).$$

**Theorem 1** (Theorem 1 restated). There exist constants  $c_1, c_2$  and  $c_3$  so that for any  $\epsilon < c_1 T/n^2$ , Algorithm 1 is  $(\epsilon, \delta)$ -differentially private for any  $\delta > 0$  if we choose

$$\sigma_{\mathbf{w}} \geq \frac{c_2 G_{\mathbf{w}} \sqrt{T \log(1/\delta)}}{n \epsilon} \quad \text{and} \quad \sigma_{\mathbf{v}} \geq \frac{c_3 G_{\mathbf{v}} \sqrt{T \log(1/\delta)}}{n \epsilon}.$$

<sup>1</sup>In our case we use uniform sampling on each iteration to construct  $I_t$  and therefore  $S_t$ , as opposed to the Poisson sampling in Abadi et al. [2016]. However, one can verify that similar moment estimates lead to our stated result [Wang et al., 2019]

*Proof.* Let  $S = \{\mathbf{z}_1, \dots, \mathbf{z}_n\}$  and  $S' = \{\mathbf{z}'_1, \dots, \mathbf{z}'_n\}$  be two neighboring datasets. At iteration  $t$ , we first focus on  $A_t^{\mathbf{w}} = \frac{1}{m} \sum_{j=1}^m \nabla_{\mathbf{w}} f(\mathbf{w}_t, \mathbf{v}_t; \mathbf{z}_{i_t^j}) + \xi_t$ . Since  $f(\cdot, \mathbf{v}; \mathbf{z})$  is  $G_{\mathbf{w}}$ -Lipschitz continuous, it implies for any neighboring datasets  $S, S'$ ,

$$\left\| \frac{1}{m} \sum_{j=1}^m \nabla_{\mathbf{w}} f(\mathbf{w}_t, \mathbf{v}_t; \mathbf{z}_{i_t^j}) - \frac{1}{m} \sum_{j=1}^m \nabla_{\mathbf{w}} f(\mathbf{w}_t, \mathbf{v}_t; \mathbf{z}'_{i_t^j}) \right\|_2 \leq \frac{2G_{\mathbf{w}}}{m}.$$

Therefore we can define  $g_t(S_t) = \frac{1}{2G_{\mathbf{w}}} \sum_{j=1}^m \nabla_{\mathbf{w}} f(\mathbf{w}_t, \mathbf{v}_t; \mathbf{z}_{i_t^j})$  such that  $\Delta(g_t) = 1$ . By Lemma 1 b) and 2, the log moment of the composite mechanism  $A^{\mathbf{w}} = (A_1^{\mathbf{w}}, \dots, A_T^{\mathbf{w}})$  can be bounded as follows

$$\alpha_{A^{\mathbf{w}}}(\lambda) \leq \frac{m^2 T \lambda^2}{n^2 \tilde{\sigma}_{\mathbf{w}}^2}.$$

where  $\tilde{\sigma}_{\mathbf{w}} = \sigma_{\mathbf{w}}/2G_{\mathbf{w}}$ . Similarly, since  $A_t^{\mathbf{v}} = \nabla_{\mathbf{v}} f(\mathbf{w}_t, \mathbf{v}_t; \mathbf{z}_{i_t}) + \zeta_t$  has  $\ell_2$ -sensitivity  $2G_{\mathbf{v}}/m$ , then the log moment of the final output  $A = (A_1^{\mathbf{w}}, A_1^{\mathbf{v}}, \dots, A_T^{\mathbf{w}}, A_T^{\mathbf{v}})$  can be bounded as follows

$$\alpha_A(\lambda) \leq \alpha_{A^{\mathbf{v}}}(\lambda) + \alpha_{A^{\mathbf{w}}}(\lambda) \leq \frac{m^2 T \lambda^2}{n^2 \tilde{\sigma}_{\mathbf{w}}^2} + \frac{m^2 T \lambda^2}{n^2 \tilde{\sigma}_{\mathbf{v}}^2}.$$

By Lemma 1 a), to guarantee  $A$  to be  $(\epsilon, \delta)$ -differentially private, it suffices that

$$\frac{\lambda^2 m^2 T}{n^2 \tilde{\sigma}_{\mathbf{w}}^2} \leq \frac{\lambda \epsilon}{4}, \frac{\lambda^2 m^2 T}{n^2 \tilde{\sigma}_{\mathbf{v}}^2} \leq \frac{\lambda \epsilon}{4}, \exp(-\frac{\lambda \epsilon}{4}) \leq \delta, \lambda \leq \tilde{\sigma}_{\mathbf{w}}^2 \log\left(\frac{n}{m \tilde{\sigma}_{\mathbf{w}}}\right) \text{ and } \lambda \leq \tilde{\sigma}_{\mathbf{v}}^2 \log\left(\frac{n}{m \tilde{\sigma}_{\mathbf{v}}}\right)$$

It is now easy to verify that when  $\epsilon = c_1 m^2 T / n^2$ , we can satisfy all these conditions by setting

$$\tilde{\sigma}_{\mathbf{w}} \geq \frac{c_2 \sqrt{T \log(1/\delta)}}{n \epsilon} \text{ and } \tilde{\sigma}_{\mathbf{v}} \geq \frac{c_3 \sqrt{T \log(1/\delta)}}{n \epsilon}$$

for some explicit constants  $c_1, c_2$  and  $c_3$ . The proof is complete.  $\square$

*Proof of Remark 1.* Without loss of generality, we consider with only one  $\sigma$  in the the proof of Theorem 1. Then algorithm  $A$  is guaranteed to be  $(\epsilon, \delta)$ -DP if one can find  $\lambda > 0$  such that

$$\frac{\lambda^2 m^2 T}{n^2 \sigma^2} \leq \frac{\lambda \epsilon}{2}, \exp(-\frac{\lambda \epsilon}{2}) \leq \delta, \text{ and } \lambda \leq \sigma^2 \log\left(\frac{n}{m \sigma}\right)$$

Given  $\delta = \frac{1}{n^2}$ , the second inequality can be reformulated as  $\lambda \geq \frac{4 \log(n)}{\epsilon}$ . Therefore by choosing  $\sigma^2 = \frac{8m^2 T \log(n)}{n^2 \epsilon^2}$ , the first inequality becomes  $\lambda \leq \frac{4 \log(n)}{\epsilon}$ , indicating  $\lambda = \frac{4 \log(n)}{\epsilon}$ . It suffices to show such choice of  $\lambda$  satisfies the third inequality, which is straightforward by the choice of  $m$  and  $\epsilon \leq 1$ . The proof is complete.  $\square$

## C Proofs for the convex-concave setting in Section 3.1

Recall that the error decomposition (4) given in Section 3.1 that the weak PD risk can be decomposed as follows:

$$\Delta^w(\bar{\mathbf{w}}_T, \bar{\mathbf{v}}_T) = \Delta^w(\bar{\mathbf{w}}_T, \bar{\mathbf{v}}_T) - \Delta_S^w(\bar{\mathbf{w}}_T, \bar{\mathbf{v}}_T) + \Delta_S^w(\bar{\mathbf{w}}_T, \bar{\mathbf{v}}_T), \quad (1)$$

where the term  $\Delta^w(\bar{\mathbf{w}}_T, \bar{\mathbf{v}}_T) - \Delta_S^w(\bar{\mathbf{w}}_T, \bar{\mathbf{v}}_T)$  is the generalization error and the term  $\Delta_S^w(\bar{\mathbf{w}}_T, \bar{\mathbf{v}}_T)$  is the optimization error.

The proof of Theorem 2 involves the estimation of the optimization error and generalization error which are performed in the subsequent subsection, respectively.

## C.1 Estimation of Optimization Error

We start by studying the optimization error for Algorithm 1. This is obtained as a direct corollary of Nemirovski et al. [2009], with the existence of the Gaussian noise's variance and the mini-batch. Recall that  $d = \max\{d_1, d_2\}$ .

**Lemma 3.** *Suppose (A1) holds, and  $F_S$  is convex-concave. Let the stepsizes  $\eta_{\mathbf{w},t} = \eta_{\mathbf{v},t} = \eta$ ,  $t \in [T]$  for some  $\eta > 0$ . Then Algorithm 1 satisfies*

$$\sup_{\mathbf{v} \in \mathcal{V}} \mathbb{E}_A[F_S(\bar{\mathbf{w}}_T, \mathbf{v})] - \inf_{\mathbf{w} \in \mathcal{W}} \mathbb{E}_A[F_S(\mathbf{w}, \bar{\mathbf{v}}_T)] \leq \frac{\eta(G_{\mathbf{w}}^2 + G_{\mathbf{v}}^2)}{2} + \frac{D_{\mathbf{w}}^2 + D_{\mathbf{v}}^2}{\eta T} + \frac{(D_{\mathbf{w}}G_{\mathbf{w}} + D_{\mathbf{v}}G_{\mathbf{v}})}{\sqrt{mT}} + \eta d(\sigma_{\mathbf{w}}^2 + \sigma_{\mathbf{v}}^2).$$

*Proof.* According to the non-expansiveness of projection and update rule of Algorithm 1, for any  $\mathbf{w} \in \mathcal{W}$ , we have

$$\begin{aligned} \|\mathbf{w}_{t+1} - \mathbf{w}\|_2^2 &\leq \left\| \mathbf{w}_t - \mathbf{w} - \frac{\eta}{m} \sum_{j=1}^m \nabla_{\mathbf{w}} f(\mathbf{w}_t, \mathbf{v}_t; \mathbf{z}_{i_t^j}) - \eta \xi_t \right\|_2^2 \\ &\leq \|\mathbf{w}_t - \mathbf{w}\|_2^2 + 2\eta \left\langle \mathbf{w} - \mathbf{w}_t, \frac{1}{m} \sum_{j=1}^m \nabla_{\mathbf{w}} f(\mathbf{w}_t, \mathbf{v}_t; \mathbf{z}_{i_t^j}) + \xi_t \right\rangle + \eta^2 \left\| \frac{1}{m} \sum_{j=1}^m \nabla_{\mathbf{w}} f(\mathbf{w}_t, \mathbf{v}_t; \mathbf{z}_{i_t^j}) \right\|_2^2 + \eta^2 \|\xi_t\|_2^2 \\ &\quad + 2\eta^2 \left\langle \frac{1}{m} \sum_{j=1}^m \nabla_{\mathbf{w}} f(\mathbf{w}_t, \mathbf{v}_t; \mathbf{z}_{i_t^j}), \xi_t \right\rangle \\ &\leq \|\mathbf{w}_t - \mathbf{w}\|_2^2 + 2\eta \langle \mathbf{w} - \mathbf{w}_t, \nabla_{\mathbf{w}} F_S(\mathbf{w}_t, \mathbf{v}_t) \rangle + 2\eta \left\langle \mathbf{w} - \mathbf{w}_t, \frac{1}{m} \sum_{j=1}^m \nabla_{\mathbf{w}} f(\mathbf{w}_t, \mathbf{v}_t; \mathbf{z}_{i_t^j}) - \nabla_{\mathbf{w}} F_S(\mathbf{w}_t, \mathbf{v}_t) \right\rangle \\ &\quad + \eta^2 G_{\mathbf{w}}^2 + \eta^2 \|\xi_t\|_2^2 + 2\eta^2 \left\langle \frac{1}{m} \sum_{j=1}^m \nabla_{\mathbf{w}} f(\mathbf{w}_t, \mathbf{v}_t; \mathbf{z}_{i_t^j}), \xi_t \right\rangle + 2\eta \langle \mathbf{w} - \mathbf{w}_t, \xi_t \rangle, \end{aligned}$$

where in the last inequality we have used  $f(\cdot, \mathbf{v}_t, \mathbf{z}_{i_t^j})$  is  $G_{\mathbf{w}}$ -Lipschitz continuous. According to the convexity of  $F_S(\cdot, \mathbf{v}_t)$  we know

$$\begin{aligned} 2\eta(F_S(\mathbf{w}_t, \mathbf{v}_t) - F_S(\mathbf{w}, \mathbf{v}_t)) &\leq \|\mathbf{w}_t - \mathbf{w}\|_2^2 - \|\mathbf{w}_{t+1} - \mathbf{w}\|_2^2 + 2\eta \left\langle \mathbf{w} - \mathbf{w}_t, \frac{1}{m} \sum_{j=1}^m \nabla_{\mathbf{w}} f(\mathbf{w}_t, \mathbf{v}_t; \mathbf{z}_{i_t^j}) - \nabla_{\mathbf{w}} F_S(\mathbf{w}_t, \mathbf{v}_t) \right\rangle \\ &\quad + \eta^2 G_{\mathbf{w}}^2 + \eta^2 \|\xi_t\|_2^2 + 2\eta^2 \left\langle \frac{1}{m} \sum_{j=1}^m \nabla_{\mathbf{w}} f(\mathbf{w}_t, \mathbf{v}_t; \mathbf{z}_{i_t^j}), \xi_t \right\rangle + 2\eta \langle \mathbf{w} - \mathbf{w}_t, \xi_t \rangle. \end{aligned}$$

Taking a summation of the above inequality from  $t = 1$  to  $T$  we derive

$$\begin{aligned} 2\eta \sum_{t=1}^T (F_S(\mathbf{w}_t, \mathbf{v}_t) - F_S(\mathbf{w}, \mathbf{v}_t)) &\leq \|\mathbf{w}_1 - \mathbf{w}\|_2^2 + 2\eta \sum_{t=1}^T \left\langle \mathbf{w} - \mathbf{w}_t, \frac{1}{m} \sum_{j=1}^m \nabla_{\mathbf{w}} f(\mathbf{w}_t, \mathbf{v}_t; \mathbf{z}_{i_t^j}) - \nabla_{\mathbf{w}} F_S(\mathbf{w}_t, \mathbf{v}_t) \right\rangle \\ &\quad + T\eta^2 G_{\mathbf{w}}^2 + \eta^2 \sum_{t=1}^T \|\xi_t\|_2^2 + 2\eta^2 \sum_{t=1}^T \left\langle \frac{1}{m} \sum_{j=1}^m \nabla_{\mathbf{w}} f(\mathbf{w}_t, \mathbf{v}_t; \mathbf{z}_{i_t^j}), \xi_t \right\rangle + 2\eta \langle \mathbf{w} - \mathbf{w}_t, \xi_t \rangle. \end{aligned}$$

It then follows from the concavity of  $F_S(\mathbf{w}, \cdot)$  and Schwartz's inequality that

$$\begin{aligned} 2 \sum_{t=1}^T \eta (F_S(\mathbf{w}_t, \mathbf{v}_t) - F_S(\mathbf{w}, \bar{\mathbf{v}}_T)) &\leq 2D_{\mathbf{w}}^2 - 2\eta \sum_{t=1}^T \left\langle \mathbf{w}_t, \frac{1}{m} \sum_{j=1}^m \nabla_{\mathbf{w}} f(\mathbf{w}_t, \mathbf{v}_t; \mathbf{z}_{i_t^j}) - \nabla_{\mathbf{w}} F_S(\mathbf{w}_t, \mathbf{v}_t) \right\rangle \\ &\quad + 2D_{\mathbf{w}}\eta \left\| \sum_{t=1}^T \left( \frac{1}{m} \sum_{j=1}^m \nabla_{\mathbf{w}} f(\mathbf{w}_t, \mathbf{v}_t; \mathbf{z}_{i_t^j}) - \nabla_{\mathbf{w}} F_S(\mathbf{w}_t, \mathbf{v}_t) \right) \right\|_2 \\ &\quad + T\eta^2 G_{\mathbf{w}}^2 + \eta^2 \sum_{t=1}^T \|\xi_t\|_2^2 + 2\eta^2 \sum_{t=1}^T \left\langle \frac{1}{m} \sum_{j=1}^m \nabla_{\mathbf{w}} f(\mathbf{w}_t, \mathbf{v}_t; \mathbf{z}_{i_t^j}), \xi_t \right\rangle + 2\eta \langle \mathbf{w} - \mathbf{w}_t, \xi_t \rangle. \quad (2) \end{aligned}$$

We can take expectations on the randomness of  $A$  over both sides of (2) and get

$$2\eta \sum_{t=1}^T \mathbb{E}_A [F_S(\mathbf{w}_t, \mathbf{v}_t) - F_S(\mathbf{w}, \bar{\mathbf{v}}_T)] \leq 2D_{\mathbf{w}}^2 + 2D_{\mathbf{w}}\eta \mathbb{E}_A \left[ \left\| \sum_{t=1}^T \frac{1}{m} \sum_{j=1}^m \nabla_{\mathbf{w}} f(\mathbf{w}_t, \mathbf{v}_t; \mathbf{z}_{i_t^j}) - \nabla_{\mathbf{w}} F_S(\mathbf{w}_t, \mathbf{v}_t) \right\|_2 \right] \\ + T\eta^2 G_{\mathbf{w}}^2 + \eta^2 d_1 \sigma_{\mathbf{w}}^2,$$

where we used that the variance  $\mathbb{E}_A[\|\xi_t\|_2^2] = d_1 \sigma_{\mathbf{w}}^2$ , the unbiasedness  $\mathbb{E}_A[\langle \mathbf{w}_t, \frac{1}{m} \sum_{j=1}^m \nabla_{\mathbf{w}} f(\mathbf{w}_t, \mathbf{v}_t; \mathbf{z}_{i_t^j}) - \nabla_{\mathbf{w}} F_S(\mathbf{w}_t, \mathbf{v}_t) \rangle] = 0$ , the independence  $\mathbb{E}_A[\langle \frac{1}{m} \sum_{j=1}^m \nabla_{\mathbf{w}} f(\mathbf{w}_t, \mathbf{v}_t; \mathbf{z}_{i_t^j}), \xi_t \rangle] = 0$  and  $\mathbb{E}_A[\langle \mathbf{w} - \mathbf{w}_t, \xi_t \rangle] = 0$ . Since the above inequality holds for all  $\mathbf{w}$ , we further get

$$2\eta \sum_{t=1}^T \mathbb{E}_A [F_S(\mathbf{w}_t, \mathbf{v}_t)] - \inf_{\mathbf{w} \in \mathcal{W}} \mathbb{E}_A [F_S(\mathbf{w}, \bar{\mathbf{v}}_T)] \leq 2D_{\mathbf{w}}^2 + 2D_{\mathbf{w}}\eta \mathbb{E}_A \left[ \left\| \sum_{t=1}^T \frac{1}{m} \sum_{j=1}^m \nabla_{\mathbf{w}} f(\mathbf{w}_t, \mathbf{v}_t; \mathbf{z}_{i_t^j}) - \nabla_{\mathbf{w}} F_S(\mathbf{w}_t, \mathbf{v}_t) \right\|_2 \right] \\ + T\eta^2 G_{\mathbf{w}}^2 + \eta^2 d_1 \sigma_{\mathbf{w}}^2, \quad (3)$$

According to Jensen's inequality and  $G_{\mathbf{w}}$ -Lipschitz continuity we further derive

$$\left( \mathbb{E}_A \left[ \left\| \sum_{t=1}^T \left( \frac{1}{m} \sum_{j=1}^m \nabla_{\mathbf{w}} f(\mathbf{w}_t, \mathbf{v}_t; \mathbf{z}_{i_t^j}) - \nabla_{\mathbf{w}} F_S(\mathbf{w}_t, \mathbf{v}_t) \right) \right\|_2 \right] \right)^2 \\ \leq \mathbb{E}_A \left[ \left\| \sum_{t=1}^T \left( \frac{1}{m} \sum_{j=1}^m \nabla_{\mathbf{w}} f(\mathbf{w}_t, \mathbf{v}_t; \mathbf{z}_{i_t^j}) - \nabla_{\mathbf{w}} F_S(\mathbf{w}_t, \mathbf{v}_t) \right) \right\|_2^2 \right] = \sum_{t=1}^T \mathbb{E}_A \left[ \left\| \frac{1}{m} \sum_{j=1}^m \nabla_{\mathbf{w}} f(\mathbf{w}_t, \mathbf{v}_t; \mathbf{z}_{i_t^j}) - \nabla_{\mathbf{w}} F_S(\mathbf{w}_t, \mathbf{v}_t) \right\|_2^2 \right] \\ \leq \frac{TG_{\mathbf{w}}^2}{m}.$$

Plugging the above estimate into (3) we arrive

$$2\eta \sum_{t=1}^T \mathbb{E}_A [F_S(\mathbf{w}_t, \mathbf{v}_t)] - \inf_{\mathbf{w} \in \mathcal{W}} \mathbb{E}_A [F_S(\mathbf{w}, \bar{\mathbf{v}}_T)] \leq 2D_{\mathbf{w}}^2 + \frac{2D_{\mathbf{w}}\eta G_{\mathbf{w}}\sqrt{T}}{\sqrt{m}} + T\eta^2 G_{\mathbf{w}}^2 + T\eta^2 d_1 \sigma_{\mathbf{w}}^2.$$

By dividing  $2\eta T$  on both sides we have

$$\frac{1}{T} \sum_{t=1}^T \mathbb{E}_A [F_S(\mathbf{w}_t, \mathbf{v}_t)] - \inf_{\mathbf{w} \in \mathcal{W}} \mathbb{E}_A [F_S(\mathbf{w}, \bar{\mathbf{v}}_T)] \leq \frac{D_{\mathbf{w}}^2}{\eta T} + \frac{D_{\mathbf{w}} G_{\mathbf{w}}}{\sqrt{mT}} + \frac{\eta G_{\mathbf{w}}^2}{2} + \frac{\eta d_1 \sigma_{\mathbf{w}}^2}{2}. \quad (4)$$

In a similar way, we can show that

$$\frac{1}{T} \sum_{t=1}^T \sup_{\mathbf{v} \in \mathcal{V}} \mathbb{E}_A [F_S(\bar{\mathbf{w}}_T, \mathbf{v})] - \mathbb{E}_A [F_S(\bar{\mathbf{w}}_T, \bar{\mathbf{v}}_T)] \leq \frac{D_{\mathbf{v}}^2}{\eta T} + \frac{D_{\mathbf{v}} G_{\mathbf{v}}}{\sqrt{mT}} + \frac{\eta G_{\mathbf{v}}^2}{2} + \frac{\eta d_2 \sigma_{\mathbf{v}}^2}{2}. \quad (5)$$

The stated bound then follows from (4) and (5) and the fact that  $d = \max\{d_1, d_2\}$ .  $\square$

## C.2 Estimation of Generalization Error

Next we move on to the generalization error. Firstly, we introduce a lemma that bridges the generalization and the stability. We say the randomized algorithm  $A$  is  $\varepsilon$ -weakly-stable if, for any neighboring datasets  $S, S'$ , there holds

$$\sup_{\mathbf{z}} \left( \sup_{\mathbf{v} \in \mathcal{V}} \mathbb{E}_A [f(A_{\mathbf{w}}(S), \mathbf{v}; \mathbf{z}) - f(A_{\mathbf{w}}(S'), \mathbf{v}; \mathbf{z})] + \sup_{\mathbf{w} \in \mathcal{W}} \mathbb{E}_A [f(\mathbf{w}, A_{\mathbf{v}}(S); \mathbf{z}) - f(\mathbf{w}, A_{\mathbf{v}}(S'); \mathbf{z})] \right) \leq \varepsilon.$$

**Lemma 4.** [Lei et al., 2021] *If  $A$  is  $\varepsilon$ -weakly-stable, then there holds*

$$\Delta^w(A_{\mathbf{w}}(S), A_{\mathbf{v}}(S)) - \Delta_S^w(A_{\mathbf{w}}(S), A_{\mathbf{v}}(S)) \leq \varepsilon.$$

We also need the following standard lemma before we prove the stability of DP-SGDA.

**Lemma 5** ([Rockafellar, 1976]). *Let  $f$  be a convex-concave function. Then*

$$\left\langle \begin{pmatrix} \mathbf{w} - \mathbf{w}' \\ \mathbf{v} - \mathbf{v}' \end{pmatrix}, \begin{pmatrix} \nabla_{\mathbf{w}} f(\mathbf{w}, \mathbf{v}) - \nabla_{\mathbf{w}} f(\mathbf{w}', \mathbf{v}') \\ \nabla_{\mathbf{v}} f(\mathbf{w}', \mathbf{v}') - \nabla_{\mathbf{v}} f(\mathbf{w}, \mathbf{v}) \end{pmatrix} \right\rangle \geq 0.$$

The stability analysis is given in the following lemma. This lemma is an extension of the uniform argument stability results in Lei et al. [2021] to the case of mini-batch DP-SGDA.

**Lemma 6.** *Suppose the function  $F_S$  is convex-concave. Let the stepsizes  $\eta_{\mathbf{w},t} = \eta_{\mathbf{v},t} = \eta$  for some  $\eta > 0$ .*

a) *Assume (A1) and (A3) hold, then Algorithm 1 satisfies*

$$\Delta^w(\bar{\mathbf{w}}_T, \bar{\mathbf{v}}_T) - \Delta_S^w(\bar{\mathbf{w}}_T, \bar{\mathbf{v}}_T) \leq \frac{4\sqrt{e}(T + T^2/n)(G_{\mathbf{w}} + G_{\mathbf{v}})^2 \eta \exp(L^2 T \eta^2 / 2)}{\sqrt{n}}.$$

b) *Assume (A1) holds, then Algorithm 1 satisfies*

$$\Delta^w(\bar{\mathbf{w}}_T, \bar{\mathbf{v}}_T) - \Delta_S^w(\bar{\mathbf{w}}_T, \bar{\mathbf{v}}_T) \leq 4\sqrt{2}\eta(G_{\mathbf{w}} + G_{\mathbf{v}})^2 \left( \sqrt{T} + \frac{T}{n} \right).$$

*Proof.* Without loss of generality, let  $S = \{\mathbf{z}_1, \dots, \mathbf{z}_n\}$ ,  $S' = \{\mathbf{z}'_1, \dots, \mathbf{z}'_n\}$  be neighboring datasets differing by the last element, i.e.  $\mathbf{z}_n \neq \mathbf{z}'_n$ . Let  $\{\mathbf{w}_t, \mathbf{v}_t\}$ ,  $\{\mathbf{w}'_t, \mathbf{v}'_t\}$  be the sequence produced by Algorithm 1 w.r.t.  $S$  and  $S'$ , respectively. We first prove Part a). In the case  $n \notin I_t$ , by the non-expansiveness of projection, we have

$$\begin{aligned} & \left\| \begin{pmatrix} \mathbf{w}_{t+1} - \mathbf{w}'_{t+1} \\ \mathbf{v}_{t+1} - \mathbf{v}'_{t+1} \end{pmatrix} \right\|_2^2 \leq \left\| \begin{pmatrix} \mathbf{w}_t - \frac{\eta}{m} \sum_{j=1}^m \nabla_{\mathbf{w}} f(\mathbf{w}_t, \mathbf{v}_t; z_{i_t}^j) - \eta \xi_t - \mathbf{w}'_t + \frac{\eta}{m} \sum_{j=1}^m \nabla_{\mathbf{w}} f(\mathbf{w}'_t, \mathbf{v}'_t; z_{i_t}^j) + \eta \xi_t \\ \mathbf{v}_t + \frac{\eta}{m} \sum_{j=1}^m \nabla_{\mathbf{v}} f(\mathbf{w}_t, \mathbf{v}_t; z_{i_t}^j) + \eta \zeta_t - \mathbf{v}'_t - \frac{\eta}{m} \sum_{j=1}^m \nabla_{\mathbf{v}} f(\mathbf{w}'_t, \mathbf{v}'_t; z_{i_t}^j) - \eta \zeta_t \end{pmatrix} \right\|_2^2 \\ & = \left\| \begin{pmatrix} \mathbf{w}_t - \mathbf{w}'_t \\ \mathbf{v}_t - \mathbf{v}'_t \end{pmatrix} \right\|_2^2 + \frac{\eta}{m} \sum_{j=1}^m \left\langle \begin{pmatrix} \mathbf{w}_t - \mathbf{w}'_t \\ \mathbf{v}_t - \mathbf{v}'_t \end{pmatrix}, \begin{pmatrix} \nabla_{\mathbf{w}} f(\mathbf{w}_t, \mathbf{v}_t; z_{i_t}^j) - \nabla_{\mathbf{w}} f(\mathbf{w}'_t, \mathbf{v}'_t; z_{i_t}^j) \\ \nabla_{\mathbf{v}} f(\mathbf{w}'_t, \mathbf{v}'_t; z_{i_t}^j) - \nabla_{\mathbf{v}} f(\mathbf{w}_t, \mathbf{v}_t; z_{i_t}^j) \end{pmatrix} \right\rangle \\ & + \left\| \begin{pmatrix} \frac{\eta}{m} \sum_{j=1}^m (\nabla_{\mathbf{w}} f(\mathbf{w}_t, \mathbf{v}_t; z_n) - \nabla_{\mathbf{w}} f(\mathbf{w}'_t, \mathbf{v}'_t; z'_n)) \\ \frac{\eta}{m} \sum_{j=1}^m (\nabla_{\mathbf{v}} f(\mathbf{w}_t, \mathbf{v}_t; z_n) - \nabla_{\mathbf{v}} f(\mathbf{w}'_t, \mathbf{v}'_t; z'_n)) \end{pmatrix} \right\|_2^2 \\ & \leq (1 + L^2 \eta^2) \left\| \begin{pmatrix} \mathbf{w}_t - \mathbf{w}'_t \\ \mathbf{v}_t - \mathbf{v}'_t \end{pmatrix} \right\|_2^2, \end{aligned}$$

where the last inequality follows from Lemma 5 and the  $L$ -smoothness assumption. If  $n \in I_t$ , then it follows that

$$\begin{aligned} & \left\| \begin{pmatrix} \mathbf{w}_{t+1} - \mathbf{w}'_{t+1} \\ \mathbf{v}_{t+1} - \mathbf{v}'_{t+1} \end{pmatrix} \right\|_2^2 \leq \left\| \begin{pmatrix} \mathbf{w}_t - \frac{\eta}{m} \sum_{j=1}^m \nabla_{\mathbf{w}} f(\mathbf{w}_t, \mathbf{v}_t; z_{i_t}^j) - \eta \xi_t - \mathbf{w}'_t + \frac{\eta}{m} \sum_{j=1}^m \nabla_{\mathbf{w}} f(\mathbf{w}'_t, \mathbf{v}'_t; z'_{i_t}^j) + \eta \xi_t \\ \mathbf{v}_t + \frac{\eta}{m} \sum_{j=1}^m \nabla_{\mathbf{v}} f(\mathbf{w}_t, \mathbf{v}_t; z_{i_t}^j) + \eta \zeta_t - \mathbf{v}'_t - \frac{\eta}{m} \sum_{j=1}^m \nabla_{\mathbf{v}} f(\mathbf{w}'_t, \mathbf{v}'_t; z'_{i_t}^j) - \eta \zeta_t \end{pmatrix} \right\|_2^2 \\ & \leq \frac{1}{m} \sum_{i_t^j \in I_t, i_t^j \neq n} \left\| \begin{pmatrix} \mathbf{w}_t - \eta \nabla_{\mathbf{w}} f(\mathbf{w}_t, \mathbf{v}_t; z_{i_t}^j) - \mathbf{w}'_t + \eta \nabla_{\mathbf{w}} f(\mathbf{w}'_t, \mathbf{v}'_t; z'_{i_t}^j) \\ \mathbf{v}_t + \eta \nabla_{\mathbf{v}} f(\mathbf{w}_t, \mathbf{v}_t; z_{i_t}^j) - \mathbf{v}'_t - \eta \nabla_{\mathbf{v}} f(\mathbf{w}'_t, \mathbf{v}'_t; z'_{i_t}^j) \end{pmatrix} \right\|_2^2 \\ & + \frac{1}{m} \left\| \begin{pmatrix} \mathbf{w}_t - \eta \nabla_{\mathbf{w}} f(\mathbf{w}_t, \mathbf{v}_t; z_n) - \mathbf{w}'_t + \eta \nabla_{\mathbf{w}} f(\mathbf{w}'_t, \mathbf{v}'_t; z'_n) \\ \mathbf{v}_t + \eta \nabla_{\mathbf{v}} f(\mathbf{w}_t, \mathbf{v}_t; z_n) - \mathbf{v}'_t - \eta \nabla_{\mathbf{v}} f(\mathbf{w}'_t, \mathbf{v}'_t; z'_n) \end{pmatrix} \right\|_2^2 \\ & \leq \frac{m-1}{m} (1 + L^2 \eta^2) \left\| \begin{pmatrix} \mathbf{w}_t - \mathbf{w}'_t \\ \mathbf{v}_t - \mathbf{v}'_t \end{pmatrix} \right\|_2^2 + \frac{1+p}{m} \left\| \begin{pmatrix} \mathbf{w}_t - \mathbf{w}'_t \\ \mathbf{v}_t - \mathbf{v}'_t \end{pmatrix} \right\|_2^2 \\ & + \frac{1+1/p}{m} \eta^2 \left\| \begin{pmatrix} \nabla_{\mathbf{w}} f(\mathbf{w}_t, \mathbf{v}_t; z_n) - \nabla_{\mathbf{w}} f(\mathbf{w}'_t, \mathbf{v}'_t; z'_n) \\ \nabla_{\mathbf{v}} f(\mathbf{w}_t, \mathbf{v}_t; z_n) - \nabla_{\mathbf{v}} f(\mathbf{w}'_t, \mathbf{v}'_t; z'_n) \end{pmatrix} \right\|_2^2, \end{aligned} \tag{6}$$

where in the last inequality we used the elementary inequality  $(a+b)^2 \leq (1+p)a^2 + (1+1/p)b^2$  ( $p > 0$ ). Since  $I_t$  are drawn uniformly at random with replacement, the event  $n \notin I_t$  happens with probability  $1 - m/n$  and the event  $n \in I_t$  happens with probability  $m/n$ . Therefore, we know

$$\begin{aligned} \mathbb{E}_{I_t} \left[ \left\| \begin{pmatrix} \mathbf{w}_{t+1} - \mathbf{w}'_{t+1} \\ \mathbf{v}_{t+1} - \mathbf{v}'_{t+1} \end{pmatrix} \right\|_2^2 \right] &\leq \frac{(n-m)(1+L^2\eta^2)}{n} \left\| \begin{pmatrix} \mathbf{w}_t - \mathbf{w}'_t \\ \mathbf{v}_t - \mathbf{v}'_t \end{pmatrix} \right\|_2^2 + \frac{m(1+L^2\eta^2)}{n} \frac{m-1}{m} \left\| \begin{pmatrix} \mathbf{w}_t - \mathbf{w}'_t \\ \mathbf{v}_t - \mathbf{v}'_t \end{pmatrix} \right\|_2^2 \\ &\quad + \frac{m}{n} \frac{1+p}{m} \left\| \begin{pmatrix} \mathbf{w}_t - \mathbf{w}'_t \\ \mathbf{v}_t - \mathbf{v}'_t \end{pmatrix} \right\|_2^2 + \frac{m}{n} \frac{4(1+1/p)}{m} \eta^2 (G_{\mathbf{w}}^2 + G_{\mathbf{v}}^2) \\ &\leq (1+L^2\eta^2 + p/n) \left\| \begin{pmatrix} \mathbf{w}_t - \mathbf{w}'_t \\ \mathbf{v}_t - \mathbf{v}'_t \end{pmatrix} \right\|_2^2 + \frac{4(1+1/p)}{n} \eta^2 (G_{\mathbf{w}}^2 + G_{\mathbf{v}}^2). \end{aligned}$$

Applying this inequality recursively, we derive

$$\mathbb{E}_A \left[ \left\| \begin{pmatrix} \mathbf{w}_{t+1} - \mathbf{w}'_{t+1} \\ \mathbf{v}_{t+1} - \mathbf{v}'_{t+1} \end{pmatrix} \right\|_2^2 \right] \leq \frac{4(1+1/p)}{n} (G_{\mathbf{w}}^2 + G_{\mathbf{v}}^2) \sum_{k=1}^t \eta^2 \prod_{j=k+1}^t (1+L^2\eta^2 + p/n).$$

By the elementary inequality  $1+a \leq \exp(a)$ , we further derive

$$\begin{aligned} \mathbb{E}_A \left[ \left\| \begin{pmatrix} \mathbf{w}_{t+1} - \mathbf{w}'_{t+1} \\ \mathbf{v}_{t+1} - \mathbf{v}'_{t+1} \end{pmatrix} \right\|_2^2 \right] &\leq \frac{4(1+1/p)}{n} (G_{\mathbf{w}}^2 + G_{\mathbf{v}}^2) \sum_{k=1}^t \eta^2 \prod_{j=k+1}^t \exp(L^2\eta^2 + p/n) \\ &= \frac{4(1+1/p)}{n} (G_{\mathbf{w}}^2 + G_{\mathbf{v}}^2) \sum_{k=1}^t \eta^2 \exp\left(L^2 \sum_{j=k+1}^t \eta^2 + p(t-k)/n\right) \\ &\leq \frac{4(1+1/p)}{n} (G_{\mathbf{w}}^2 + G_{\mathbf{v}}^2) \exp\left(L^2 \sum_{j=1}^t \eta^2 + pt/n\right) \sum_{k=1}^t \eta^2. \end{aligned}$$

By taking  $p = n/t$  we get

$$\mathbb{E}_A \left[ \left\| \begin{pmatrix} \mathbf{w}_{t+1} - \mathbf{w}'_{t+1} \\ \mathbf{v}_{t+1} - \mathbf{v}'_{t+1} \end{pmatrix} \right\|_2^2 \right] \leq \frac{4e(G_{\mathbf{w}}^2 + G_{\mathbf{v}}^2)(1+t/n)}{n} \exp\left(L^2 \sum_{j=1}^t \eta^2\right) \sum_{k=1}^t \eta^2.$$

Now by the Lipschitz continuity and Jensen's inequality we ave

$$\begin{aligned} &\sup_{\mathbf{z}} \left( \sup_{\mathbf{v} \in \mathcal{V}} \mathbb{E}_A[f(A_{\mathbf{w}}(S), \mathbf{v}; \mathbf{z}) - f(A_{\mathbf{w}}(S'), \mathbf{v}; \mathbf{z})] + \sup_{\mathbf{w} \in \mathcal{W}} \mathbb{E}_A[f(\mathbf{w}, A_{\mathbf{v}}(S); \mathbf{z}) - f(\mathbf{w}, A_{\mathbf{v}}(S'); \mathbf{z})] \right) \\ &\leq G_{\mathbf{w}} \mathbb{E}_A[\|\bar{\mathbf{w}}_T - \bar{\mathbf{w}}'_T\|_2] + G_{\mathbf{v}} \mathbb{E}_A[\|\bar{\mathbf{v}}_T - \bar{\mathbf{v}}'_T\|_2] \leq \frac{4\sqrt{e(T+T^2/n)}(G_{\mathbf{w}} + G_{\mathbf{v}})^2 \eta \exp(L^2 T \eta^2 / 2)}{\sqrt{n}}. \end{aligned}$$

According to Lemma 4 we know

$$\Delta^w(\bar{\mathbf{w}}_T, \bar{\mathbf{v}}_T) - \Delta_S^w(\bar{\mathbf{w}}_T, \bar{\mathbf{v}}_T) \leq \frac{4\sqrt{e(T+T^2/n)}(G_{\mathbf{w}} + G_{\mathbf{v}})^2 \eta \exp(L^2 T \eta^2 / 2)}{\sqrt{n}}.$$

Next we focus on Part b). We consider two cases at the  $t$ -th iteration. If  $n \notin I_t$ , then analogous to the discussions in Lei et al. [2021] we can show

$$\begin{aligned} \left\| \begin{pmatrix} \mathbf{w}_{t+1} - \mathbf{w}'_{t+1} \\ \mathbf{v}_{t+1} - \mathbf{v}'_{t+1} \end{pmatrix} \right\|_2^2 &\leq \left\| \begin{pmatrix} \mathbf{w}_t - \frac{\eta}{m} \sum_{j=1}^m \nabla_{\mathbf{w}} f(\mathbf{w}_t, \mathbf{v}_t; z_{i_t^j}) - \eta \xi_t - \mathbf{w}'_t + \frac{\eta}{m} \sum_{j=1}^m \nabla_{\mathbf{w}} f(\mathbf{w}'_t, \mathbf{v}'_t; z_{i_t^j}) + \eta \xi_t \\ \mathbf{v}_t + \frac{\eta}{m} \sum_{j=1}^m \nabla_{\mathbf{v}} f(\mathbf{w}_t, \mathbf{v}_t; z_{i_t^j}) + \eta \zeta_t - \mathbf{v}'_t - \frac{\eta}{m} \sum_{j=1}^m \nabla_{\mathbf{v}} f(\mathbf{w}'_t, \mathbf{v}'_t; z_{i_t^j}) - \eta \zeta_t \end{pmatrix} \right\|_2^2 \\ &\leq \left\| \begin{pmatrix} \mathbf{w}_t - \mathbf{w}'_t \\ \mathbf{v}_t - \mathbf{v}'_t \end{pmatrix} \right\|_2^2 + 4(G_{\mathbf{w}}^2 + G_{\mathbf{v}}^2) \eta^2. \end{aligned} \quad (7)$$

Combining the preceding inequality with (6) and using the probability of  $n \notin I_t$ , we derive

$$\begin{aligned} \mathbb{E}_{i_t} \left[ \left\| \begin{pmatrix} \mathbf{w}_{t+1} - \mathbf{w}'_{t+1} \\ \mathbf{v}_{t+1} - \mathbf{v}'_{t+1} \end{pmatrix} \right\|_2^2 \right] &\leq \frac{n-1}{n} \left( \left\| \begin{pmatrix} \mathbf{w}_t - \mathbf{w}'_t \\ \mathbf{v}_t - \mathbf{v}'_t \end{pmatrix} \right\|_2^2 + 4(G_{\mathbf{w}}^2 + G_{\mathbf{v}}^2)\eta^2 \right) \\ &+ \frac{1+p}{n} \left\| \begin{pmatrix} \mathbf{w}_t - \mathbf{w}'_t \\ \mathbf{v}_t - \mathbf{v}'_t \end{pmatrix} \right\|_2^2 + \frac{4(1+1/p)}{n} (G_{\mathbf{w}}^2 + G_{\mathbf{v}}^2)\eta^2 \\ &= (1+p/n) \left\| \begin{pmatrix} \mathbf{w}_t - \mathbf{w}'_t \\ \mathbf{v}_t - \mathbf{v}'_t \end{pmatrix} \right\|_2^2 + 4(G_{\mathbf{w}}^2 + G_{\mathbf{v}}^2)\eta^2(1+1/(np)). \end{aligned}$$

Applying this inequality recursively implies that

$$\begin{aligned} \mathbb{E}_A \left[ \left\| \begin{pmatrix} \mathbf{w}_{t+1} - \mathbf{w}'_{t+1} \\ \mathbf{v}_{t+1} - \mathbf{v}'_{t+1} \end{pmatrix} \right\|_2^2 \right] &\leq 4(G_{\mathbf{w}}^2 + G_{\mathbf{v}}^2)\eta^2(1+1/(np)) \sum_{k=1}^t \left(1 + \frac{p}{n}\right)^{t-k} \\ &= 4(G_{\mathbf{w}}^2 + G_{\mathbf{v}}^2)\eta^2 \left(1 + \frac{1}{np}\right) \frac{n}{p} \left( \left(1 + \frac{p}{n}\right)^t - 1 \right) = 4(G_{\mathbf{w}}^2 + G_{\mathbf{v}}^2)\eta^2 \left( \frac{n}{p} + \frac{1}{p^2} \right) \left( \left(1 + \frac{p}{n}\right)^t - 1 \right). \end{aligned}$$

By taking  $p = n/t$  in the above inequality and using  $(1 + 1/t)^t \leq e$ , we get

$$\mathbb{E}_A \left[ \left\| \begin{pmatrix} \mathbf{w}_{t+1} - \mathbf{w}'_{t+1} \\ \mathbf{v}_{t+1} - \mathbf{v}'_{t+1} \end{pmatrix} \right\|_2^2 \right] \leq 16(G_{\mathbf{w}}^2 + G_{\mathbf{v}}^2)\eta^2 \left( t + \frac{t^2}{n^2} \right).$$

Now by the Lipschitz continuity and Jensen's inequality we ave

$$\begin{aligned} &\sup_{\mathbf{z}} \left( \sup_{\mathbf{v} \in \mathcal{V}} \mathbb{E}_A [f(A_{\mathbf{w}}(S), \mathbf{v}; \mathbf{z}) - f(A_{\mathbf{w}}(S'), \mathbf{v}; \mathbf{z})] + \sup_{\mathbf{w} \in \mathcal{W}} \mathbb{E}_A [f(\mathbf{w}, A_{\mathbf{v}}(S); \mathbf{z}) - f(\mathbf{w}, A_{\mathbf{v}}(S'); \mathbf{z})] \right) \\ &\leq G_{\mathbf{w}} \mathbb{E}_A [\|\bar{\mathbf{w}}_T - \bar{\mathbf{w}}'_T\|_2] + G_{\mathbf{v}} \mathbb{E}_A [\|\bar{\mathbf{v}}_T - \bar{\mathbf{v}}'_T\|_2] \leq 4\sqrt{2}(G_{\mathbf{w}} + G_{\mathbf{v}})^2 \eta^2 \left( \sqrt{T} + \frac{T}{n} \right). \end{aligned}$$

According to Lemma 4 we know

$$\Delta^w(\bar{\mathbf{w}}_T, \bar{\mathbf{v}}_T) - \Delta_S^w(\bar{\mathbf{w}}_T, \bar{\mathbf{v}}_T) \leq 32(G_{\mathbf{w}} + G_{\mathbf{v}})^2 \eta^2 \left( \sqrt{T} + \frac{T}{n} \right).$$

□

### C.3 Proof of Theorem 2

Finally we are ready to present the proof of Theorem 2.

**Theorem 2** (Theorem 2 restated). *Suppose the function  $F_S$  is convex-concave. Let the stepsizes  $\eta_{\mathbf{w},t} = \eta_{\mathbf{v},t} = \eta$ ,  $t = [T]$  for some  $\eta > 0$ .*

- a) *Assume (A1) and (A3) hold. If we choose  $T \asymp n$  and  $\eta \asymp 1/\left(\sqrt{L} \max\{\sqrt{n}, \sqrt{d \log(1/\delta)}/\epsilon\}\right)$ , then Algorithm 1 satisfies*

$$\Delta^w(\bar{\mathbf{w}}_T, \bar{\mathbf{v}}_T) = \mathcal{O} \left( \max\{G_{\mathbf{w}}^2 + G_{\mathbf{v}}^2, (G_{\mathbf{w}} + G_{\mathbf{v}})^2, D_{\mathbf{w}}^2 + D_{\mathbf{v}}^2, D_{\mathbf{w}}G_{\mathbf{w}} + D_{\mathbf{v}}G_{\mathbf{v}}\} \max \left\{ \frac{1}{\sqrt{n}}, \frac{\sqrt{d \log(1/\delta)}}{n\epsilon} \right\} \right).$$

- b) *Assume (A1) holds. If we choose  $T \asymp n^2$  and  $\eta \asymp 1/\left(n \max\{\sqrt{n}, \sqrt{d \log(1/\delta)}/\epsilon\}\right)$ , then Algorithm 1 satisfies*

$$\Delta^w(\bar{\mathbf{w}}_T, \bar{\mathbf{v}}_T) = \mathcal{O} \left( \max\{G_{\mathbf{w}}^2 + G_{\mathbf{v}}^2, (G_{\mathbf{w}} + G_{\mathbf{v}})^2, D_{\mathbf{w}}^2 + D_{\mathbf{v}}^2, D_{\mathbf{w}}G_{\mathbf{w}} + D_{\mathbf{v}}G_{\mathbf{v}}\} \max \left\{ \frac{1}{\sqrt{n}}, \frac{\sqrt{d \log(1/\delta)}}{n\epsilon} \right\} \right).$$



*Proof of Theorem 2.* We first focus on Part a). According to Part a) of Lemma 6 we know

$$\Delta^w(\bar{\mathbf{w}}_T, \bar{\mathbf{v}}_T) - \Delta_S^w(\bar{\mathbf{w}}_T, \bar{\mathbf{v}}_T) \leq \frac{4\sqrt{e(T+T^2/n)}(G_{\mathbf{w}}+G_{\mathbf{v}})^2\eta \exp(L^2T\eta^2/2)}{\sqrt{n}}$$

and by Lemma 3 we know

$$\Delta_S^w(\bar{\mathbf{w}}_T, \bar{\mathbf{v}}_T) \leq \frac{\eta(G_{\mathbf{w}}^2+G_{\mathbf{v}}^2)}{2} + \frac{D_{\mathbf{w}}^2+D_{\mathbf{v}}^2}{2\eta T} + \frac{D_{\mathbf{w}}G_{\mathbf{w}}+D_{\mathbf{v}}G_{\mathbf{v}}}{\sqrt{mT}} + \eta d(\sigma_{\mathbf{w}}^2+\sigma_{\mathbf{v}}^2).$$

Combining the above two quantities we have

$$\begin{aligned} \Delta^w(\bar{\mathbf{w}}_T, \bar{\mathbf{v}}_T) &\leq \frac{4\sqrt{e(T+T^2/n)}(G_{\mathbf{w}}+G_{\mathbf{v}})^2\eta \exp(L^2T\eta^2/2)}{\sqrt{n}} + \frac{\eta(G_{\mathbf{w}}^2+G_{\mathbf{v}}^2)}{2} + \frac{D_{\mathbf{w}}^2+D_{\mathbf{v}}^2}{2\eta T} \\ &\quad + \frac{D_{\mathbf{w}}G_{\mathbf{w}}+D_{\mathbf{v}}G_{\mathbf{v}}}{\sqrt{mT}} + \eta d(\sigma_{\mathbf{w}}^2+\sigma_{\mathbf{v}}^2). \end{aligned} \quad (8)$$

Furthermore, by Theorem 1, we know

$$\sigma_{\mathbf{w}}^2 = \mathcal{O}\left(\frac{G_{\mathbf{w}}^2T \log(1/\delta)}{n^2\epsilon^2}\right), \quad \sigma_{\mathbf{v}}^2 = \mathcal{O}\left(\frac{G_{\mathbf{v}}^2T \log(1/\delta)}{n^2\epsilon^2}\right).$$

Plugging it back into (8) we have

$$\begin{aligned} \Delta^w(\bar{\mathbf{w}}_T, \bar{\mathbf{v}}_T) &= \mathcal{O}\left(\frac{\sqrt{(T+T^2/n)}(G_{\mathbf{w}}+G_{\mathbf{v}})^2\eta \exp(L^2T\eta^2)}{\sqrt{n}} \right. \\ &\quad \left. + \frac{\eta(G_{\mathbf{w}}^2+G_{\mathbf{v}}^2)}{2} + \frac{D_{\mathbf{w}}^2+D_{\mathbf{v}}^2}{2\eta T} + \frac{D_{\mathbf{w}}G_{\mathbf{w}}+D_{\mathbf{v}}G_{\mathbf{v}}}{\sqrt{mT}} + \frac{\eta(G_{\mathbf{w}}^2+G_{\mathbf{v}}^2)Td \log(1/\delta)}{n^2\epsilon^2}\right). \end{aligned}$$

By picking  $T \asymp n$  and  $\eta \asymp 1/(L \max\{\sqrt{n}, \sqrt{d \log(1/\delta)}/\epsilon\})$  we have  $\exp(L^2T\eta^2) = \mathcal{O}\left(\min\{1, \frac{n\epsilon^2}{d \log(1/\delta)}\}\right) = \mathcal{O}(1)$  and

$$\Delta^w(\bar{\mathbf{w}}_T, \bar{\mathbf{v}}_T) = \mathcal{O}\left(\max\{G_{\mathbf{w}}^2+G_{\mathbf{v}}^2, (G_{\mathbf{w}}+G_{\mathbf{v}})^2, D_{\mathbf{w}}^2+D_{\mathbf{v}}^2, D_{\mathbf{w}}G_{\mathbf{w}}+D_{\mathbf{v}}G_{\mathbf{v}}\} \max\left\{\frac{1}{\sqrt{n}}, \frac{\sqrt{d \log(1/\delta)}}{n\epsilon}\right\}\right).$$

We now turn to Part b). According to Lemma 6 Part b) we know

$$\Delta^w(\bar{\mathbf{w}}_T, \bar{\mathbf{v}}_T) - \Delta_S^w(\bar{\mathbf{w}}_T, \bar{\mathbf{v}}_T) \leq 4\sqrt{2}\eta(G_{\mathbf{w}}+G_{\mathbf{v}})^2\left(\sqrt{T} + \frac{T}{n}\right).$$

Similar to Part a) we have

$$\Delta^w(\bar{\mathbf{w}}_T, \bar{\mathbf{v}}_T) = \mathcal{O}\left(\eta(G_{\mathbf{w}}+G_{\mathbf{v}})^2\left(\sqrt{T} + \frac{T}{n}\right) + \frac{\eta(G_{\mathbf{w}}^2+G_{\mathbf{v}}^2)}{2} + \frac{D_{\mathbf{w}}^2+D_{\mathbf{v}}^2}{2\eta T} + \frac{D_{\mathbf{w}}G_{\mathbf{w}}+D_{\mathbf{v}}G_{\mathbf{v}}}{\sqrt{mT}} + \frac{\eta(G_{\mathbf{w}}^2+G_{\mathbf{v}}^2)Td \log(1/\delta)}{n^2\epsilon^2}\right).$$

By picking  $T \asymp n^2$  and  $\eta \asymp 1/(n \max\{\sqrt{n}, \sqrt{d \log(1/\delta)}/\epsilon\})$  we have

$$\Delta^w(\bar{\mathbf{w}}_T, \bar{\mathbf{v}}_T) = \mathcal{O}\left(\max\{G_{\mathbf{w}}^2+G_{\mathbf{v}}^2, (G_{\mathbf{w}}+G_{\mathbf{v}})^2, D_{\mathbf{w}}^2+D_{\mathbf{v}}^2, D_{\mathbf{w}}G_{\mathbf{w}}+D_{\mathbf{v}}G_{\mathbf{v}}\} \max\left\{\frac{1}{\sqrt{n}}, \frac{\sqrt{d \log(1/\delta)}}{n\epsilon}\right\}\right).$$

The proof is complete.  $\square$

## D Proofs for the nonconvex-strongly-concave setting in Section 3.2

In this section, we will provide the proofs for the theorems in Section 3.2. Recall that we define  $R_S^* = \min_{\mathbf{w} \in \mathcal{W}} R_S(\mathbf{w})$ , and  $R^* = \min_{\mathbf{w} \in \mathcal{W}} R(\mathbf{w})$ . Then, for any  $\mathbf{w}^* \in \arg \min_{\mathbf{w}} R(\mathbf{w})$  we have the error decomposition:

$$\begin{aligned} \mathbb{E}[R(\mathbf{w}_T) - R^*] &= \mathbb{E}[R(\mathbf{w}_T) - R_S(\mathbf{w}_T)] + \mathbb{E}[R_S(\mathbf{w}_T) - R_S^*] + \mathbb{E}[R_S^* - R_S(\mathbf{w}^*)] + \mathbb{E}[R_S(\mathbf{w}^*) - R(\mathbf{w}^*)] \\ &\leq \mathbb{E}[R(\mathbf{w}_T) - R_S(\mathbf{w}_T)] + \mathbb{E}[R_S(\mathbf{w}^*) - R(\mathbf{w}^*)] + \mathbb{E}[R_S(\mathbf{w}_T) - R_S^*]. \end{aligned}$$

The term  $\mathbb{E}[R_S(\mathbf{w}_T) - R_S^*]$  is the *optimization error* which characterizes the discrepancy between the primal empirical risk of an output of Algorithm 1 and the least possible one. The term  $\mathbb{E}[R(\mathbf{w}_T) - R_S(\mathbf{w}_T)] + \mathbb{E}[R_S(\mathbf{w}^*) - R(\mathbf{w}^*)]$  is called the *generalization error* which measures the discrepancy between the primal population risk and the empirical one. The estimations for these two errors are described as follows.

### D.1 Proof of Theorem 3

To prove Theorem 3, i.e., optimization error, we introduce several necessary lemmas. The first lemma is an application of Danskin's Theorem.

**Lemma 7** ([Lin et al., 2020]). *Assume (A3) holds and  $F_S(\mathbf{w}, \cdot)$  is  $\rho$ -strongly concave. Assume  $\mathcal{V}$  is a convex and bounded set. Then the function  $R_S(\mathbf{w})$  is  $L + L^2/\rho$ -smooth and  $\nabla R_S(\mathbf{w}) = \nabla_{\mathbf{w}} F_S(\mathbf{w}, \hat{\mathbf{v}}_S(\mathbf{w}))$ , where  $\hat{\mathbf{v}}_S(\mathbf{w}) = \arg \max_{\mathbf{v} \in \mathcal{V}} F_S(\mathbf{w}, \mathbf{v})$ . And  $\hat{\mathbf{v}}_S(\mathbf{w})$  is  $L/\rho$  Lipschitz continuous.*

The second lemma shows that  $R_S$  also satisfies the PL condition whenever  $F_S$  does.

**Lemma 8.** *Assume (A3) holds. Assume  $F_S(\cdot, \mathbf{v})$  satisfies PL condition with constant  $\mu$  and  $F_S(\mathbf{w}, \cdot)$  is  $\rho$ -strongly concave. Then the function  $R_S(\mathbf{w})$  satisfies the PL condition with  $\mu$ .*

*Proof.* From Lemma 7,  $\|\nabla R_S(\mathbf{w})\|_2^2 = \|\nabla_{\mathbf{w}} F_S(\mathbf{w}, \hat{\mathbf{v}}_S(\mathbf{w}))\|_2^2$ . Since  $F_S$  satisfies PL condition with constant  $\mu$ , we get

$$\|\nabla R_S(\mathbf{w})\|_2^2 \geq 2\mu(F_S(\mathbf{w}, \hat{\mathbf{v}}_S(\mathbf{w})) - \min_{\mathbf{w}' \in \mathcal{W}} F_S(\mathbf{w}', \hat{\mathbf{v}}_S(\mathbf{w}))). \quad (9)$$

Also, since  $F_S(\mathbf{w}', \hat{\mathbf{v}}_S(\mathbf{w})) \leq \max_{\mathbf{v} \in \mathcal{V}} F_S(\mathbf{w}', \mathbf{v})$ , we have

$$\min_{\mathbf{w}' \in \mathcal{W}} F_S(\mathbf{w}', \hat{\mathbf{v}}_S(\mathbf{w})) \leq \min_{\mathbf{w}' \in \mathcal{W}} \max_{\mathbf{v} \in \mathcal{V}} F_S(\mathbf{w}', \mathbf{v}) = \min_{\mathbf{w}' \in \mathcal{W}} R_S(\mathbf{w}') \quad (10)$$

Combining equation (9) and (10), we have

$$\|\nabla R_S(\mathbf{w})\|_2^2 \geq 2\mu(R_S(\mathbf{w}) - \min_{\mathbf{w}' \in \mathcal{W}} R_S(\mathbf{w}')).$$

The proof is complete.  $\square$

Now we present two key lemmas for the convergence analysis. The next lemma characterizes the descent behavior of  $R_S(\mathbf{w}_t)$ .

**Lemma 9.** *Assume (A2) and (A3) hold. Assume  $F_S(\cdot, \mathbf{v})$  satisfies the  $\mu$ -PL condition and  $F_S(\mathbf{w}, \cdot)$  is  $\rho$ -strongly concave. For Algorithm 1, the iterates  $\{\mathbf{w}_t, \mathbf{v}_t\}_{t \in [T]}$  satisfies the following inequality*

$$\begin{aligned} \mathbb{E}[R_S(\mathbf{w}_{t+1}) - R_S^*] &\leq (1 - \mu\eta_{\mathbf{w},t})\mathbb{E}[R_S(\mathbf{w}_t) - R_S^*] + \frac{L^2\eta_{\mathbf{w},t}}{2}\mathbb{E}[\|\hat{\mathbf{v}}_S(\mathbf{w}_t) - \mathbf{v}_t\|_2^2] \\ &\quad + \frac{(L + L^2/\rho)\eta_{\mathbf{w},t}^2}{2}(\frac{B_{\mathbf{w}}^2}{m} + d\sigma_{\mathbf{w}}^2). \end{aligned}$$

*Proof.* Because  $R_S$  is  $L + L^2/\rho$ -smooth by Lemma 7, we have

$$\begin{aligned} R_S(\mathbf{w}_{t+1}) - R_S^* &\leq R_S(\mathbf{w}_t) - R_S^* + \langle \nabla R_S(\mathbf{w}_t), \mathbf{w}_{t+1} - \mathbf{w}_t \rangle + \frac{L + L^2/\rho}{2} \|\mathbf{w}_{t+1} - \mathbf{w}_t\|_2^2 \\ &= R_S(\mathbf{w}_t) - R_S^* - \eta_{\mathbf{w},t} \langle \nabla R_S(\mathbf{w}_t), \mathbf{w}_t \rangle + \frac{1}{m} \sum_{j=1}^m \nabla_{\mathbf{w}} f(\mathbf{w}_t, \mathbf{v}_t; \mathbf{z}_{i_t}^j) + \xi_t \\ &\quad + \frac{(L + L^2/\rho)\eta_{\mathbf{w},t}^2}{2} \left\| \frac{1}{m} \sum_{j=1}^m \nabla_{\mathbf{w}} f(\mathbf{w}_t, \mathbf{v}_t; \mathbf{z}_{i_t}^j) + \xi_t \right\|_2^2. \end{aligned}$$

We denote  $\mathbb{E}_t$  as the conditional expectation of given  $\mathbf{w}_t$  and  $\mathbf{v}_t$ . Taking this conditional expectation of both sides, we get

$$\begin{aligned}
\mathbb{E}_t[R_S(\mathbf{w}_{t+1}) - R_S^*] &= R_S(\mathbf{w}_t) - R_S^* - \eta_{\mathbf{w},t} \langle \nabla R_S(\mathbf{w}_t), \nabla_{\mathbf{w}} F_S(\mathbf{w}_t, \mathbf{v}_t) \rangle \\
&\quad + \frac{(L + L^2/\rho)\eta_{\mathbf{w},t}^2}{2} \left\| \frac{1}{m} \sum_{j=1}^m \nabla_{\mathbf{w}} f(\mathbf{w}_t, \mathbf{v}_t; \mathbf{z}_{i_t^j}) - \nabla_{\mathbf{w}} F_S(\mathbf{w}_t, \mathbf{v}_t) + \nabla_{\mathbf{w}} F_S(\mathbf{w}_t, \mathbf{v}_t) - \xi_t \right\|_2^2 \\
&\leq R_S(\mathbf{w}_t) - R_S^* - \eta_{\mathbf{w},t} \langle \nabla R_S(\mathbf{w}_t), \nabla_{\mathbf{w}} F_S(\mathbf{w}_t, \mathbf{v}_t) \rangle \\
&\quad + \frac{(L + L^2/\rho)\eta_{\mathbf{w},t}^2}{2} \|\nabla_{\mathbf{w}} F_S(\mathbf{w}_t, \mathbf{v}_t)\|_2^2 + \frac{(L + L^2/\rho)\eta_{\mathbf{w},t}^2}{2} \left( \frac{B_{\mathbf{w}}^2}{m} + d\sigma_{\mathbf{w}}^2 \right) \\
&\leq R_S(\mathbf{w}_t) - R_S^* - \frac{\eta_{\mathbf{w},t}}{2} \|\nabla R_S(\mathbf{w}_t)\|_2^2 + \frac{\eta_{\mathbf{w},t}}{2} \|\nabla R_S(\mathbf{w}_t) - \nabla_{\mathbf{w}} F_S(\mathbf{w}_t, \mathbf{v}_t)\|_2^2 \\
&\quad + \frac{(L + L^2/\rho)\eta_{\mathbf{w},t}^2}{2} \left( \frac{B_{\mathbf{w}}^2}{m} + d\sigma_{\mathbf{w}}^2 \right),
\end{aligned}$$

where in first inequality since  $\mathbb{E}_t[\|\frac{1}{m} \sum_{j=1}^m \nabla_{\mathbf{w}} f(\mathbf{w}_t, \mathbf{v}_t; \mathbf{z}_{i_t^j}) - \nabla_{\mathbf{w}} F_S(\mathbf{w}_t, \mathbf{v}_t)\|_2^2] = \frac{1}{m} \sum_{j=1}^m \mathbb{E}_t[\|\nabla_{\mathbf{w}} f(\mathbf{w}_t, \mathbf{v}_t; \mathbf{z}_{i_t^j}) - \nabla_{\mathbf{w}} F_S(\mathbf{w}_t, \mathbf{v}_t)\|_2^2] \leq \frac{B_{\mathbf{w}}^2}{m}$  and  $\mathbb{E}_t[\|\xi_t\|_2^2] = d_1 \sigma_{\mathbf{w}}^2 \leq d\sigma_{\mathbf{w}}^2$ , and the last inequality we use  $\eta_{\mathbf{w}} \leq 1/(L + L^2/\rho)$ . Because  $R_S$  satisfies PL condition with  $\mu$  by Lemma 8, we have

$$\begin{aligned}
\mathbb{E}_t[R_S(\mathbf{w}_{t+1}) - R_S^*] &\leq (1 - \mu\eta_{\mathbf{w},t})(R_S(\mathbf{w}_t) - R_S^*) + \frac{\eta_{\mathbf{w},t}}{2} \|\nabla R_S(\mathbf{w}_t) - \nabla_{\mathbf{w}} F_S(\mathbf{w}_t, \mathbf{v}_t)\|_2^2 \\
&\quad + \frac{(L + L^2/\rho)\eta_{\mathbf{w},t}^2}{2} \left( \frac{B_{\mathbf{w}}^2}{m} + d\sigma_{\mathbf{w}}^2 \right) \\
&\leq (1 - \mu\eta_{\mathbf{w},t})(R_S(\mathbf{w}_t) - R_S^*) + \frac{L^2\eta_{\mathbf{w},t}}{2} \|\hat{\mathbf{v}}_S(\mathbf{w}_t) - \mathbf{v}_t\|_2^2 + \frac{(L + L^2/\rho)\eta_{\mathbf{w},t}^2}{2} \left( \frac{B_{\mathbf{w}}^2}{m} + d\sigma_{\mathbf{w}}^2 \right),
\end{aligned}$$

where the second we use  $F_S$  is  $L$ -smooth. Now taking expectation of both sides yields the claimed bound. The proof is complete.  $\square$

The next lemma characterizes the descent behavior of  $\mathbf{v}_t$ .

**Lemma 10.** *Assume (A2) and (A3) hold. Assume  $F_S(\cdot, \mathbf{v})$  satisfies PL condition with constant  $\mu$  and  $F_S(\mathbf{w}, \cdot)$  is  $\rho$ -strongly concave. Let  $\hat{\mathbf{v}}_S(\mathbf{w}) = \arg \max_{\mathbf{v} \in \mathcal{V}} F_S(\mathbf{w}, \mathbf{v})$ . For Algorithm 1 and any  $\epsilon > 0$ , the iterates  $\{\mathbf{w}_t, \mathbf{v}_t\}$  satisfies the following inequality*

$$\begin{aligned}
\mathbb{E}[\|\mathbf{v}_{t+1} - \hat{\mathbf{v}}_S(\mathbf{w}_{t+1})\|_2^2] &\leq \left(1 + \frac{1}{\epsilon}\right) 2L^4/\rho\eta_{\mathbf{w},t}^2 + (1 + \epsilon)(1 - \rho\eta_{\mathbf{v},t}) \mathbb{E}[\|\mathbf{v}_t - \hat{\mathbf{v}}_S(\mathbf{w}_t)\|_2^2] + \left(1 + \frac{1}{\epsilon}\right) \eta_{\mathbf{w},t}^2 L^2/\rho^2 \left( \frac{B_{\mathbf{w}}^2}{m} + d\sigma_{\mathbf{w}}^2 \right) \\
&\quad + \left(1 + \frac{1}{\epsilon}\right) 4L^2/\rho^2 (L + L^2/\rho) \eta_{\mathbf{w},t}^2 \mathbb{E}[R_S(\mathbf{w}_t) - R_S^*] + (1 + \epsilon) \eta_{\mathbf{v},t}^2 \left( \frac{B_{\mathbf{v}}^2}{m} + d\sigma_{\mathbf{v}}^2 \right).
\end{aligned}$$

*Proof.* By Young's inequality, we have

$$\|\mathbf{v}_{t+1} - \hat{\mathbf{v}}_S(\mathbf{w}_{t+1})\|_2^2 \leq (1 + \epsilon) \|\mathbf{v}_{t+1} - \hat{\mathbf{v}}_S(\mathbf{w}_t)\|_2^2 + \left(1 + \frac{1}{\epsilon}\right) \|\hat{\mathbf{v}}_S(\mathbf{w}_t) - \hat{\mathbf{v}}_S(\mathbf{w}_{t+1})\|_2^2.$$

For the term  $\|\hat{\mathbf{v}}_S(\mathbf{w}_t) - \hat{\mathbf{v}}_S(\mathbf{w}_{t+1})\|_2^2$ , since  $\hat{\mathbf{v}}_S(\cdot)$  is  $L/\rho$ -Lipschitz by Lemma 7, taking conditional expectation, we have

$$\begin{aligned}
\mathbb{E}_t[\|\hat{\mathbf{v}}_S(\mathbf{w}_{t+1}) - \hat{\mathbf{v}}_S(\mathbf{w}_t)\|_2^2] &\leq L^2/\rho^2 \mathbb{E}_t[\|\mathbf{w}_{t+1} - \mathbf{w}_t\|_2^2] = L^2/\rho^2 \eta_{\mathbf{w},t}^2 \mathbb{E}_t\left[\left\| \frac{1}{m} \sum_{j=1}^m \nabla_{\mathbf{w}} f(\mathbf{w}_t, \mathbf{v}_t; \mathbf{z}_{i_t^j}) + \xi_t \right\|_2^2\right] \\
&\leq L^2/\rho^2 \eta_{\mathbf{w},t}^2 \|\nabla_{\mathbf{w}} F_S(\mathbf{w}_t, \mathbf{v}_t)\|_2^2 + L^2/\rho^2 \eta_{\mathbf{w},t}^2 \left( \frac{B_{\mathbf{w}}^2}{m} + d\sigma_{\mathbf{w}}^2 \right) \\
&\leq 2L^2/\rho^2 \eta_{\mathbf{w},t}^2 \|\nabla R_S(\mathbf{w}_t) - \nabla_{\mathbf{w}} F_S(\mathbf{w}_t, \mathbf{v}_t)\|_2^2 + 2L^2/\rho^2 \eta_{\mathbf{w},t}^2 \|\nabla R_S(\mathbf{w}_t)\|_2^2 + L^2/\rho^2 \eta_{\mathbf{w},t}^2 \left( \frac{B_{\mathbf{w}}^2}{m} + d\sigma_{\mathbf{w}}^2 \right) \\
&\leq 2L^4/\rho^2 \eta_{\mathbf{w},t}^2 \|\hat{\mathbf{v}}_S(\mathbf{w}_t) - \mathbf{v}_t\|_2^2 + 2L^2/\rho^2 \eta_{\mathbf{w},t}^2 \|\nabla R_S(\mathbf{w}_t)\|_2^2 + L^2/\rho^2 \eta_{\mathbf{w},t}^2 \left( \frac{B_{\mathbf{w}}^2}{m} + d\sigma_{\mathbf{w}}^2 \right),
\end{aligned}$$

where the last step uses the fact that  $F_S$  is  $L$ -smooth. Because  $R_S$  is  $L + L^2/\rho$ -smooth by Lemma 7 we have  $\frac{1}{2(L+L^2/\rho)}\|\nabla R_S(\mathbf{w}_t)\|_2^2 \leq R_S(\mathbf{w}_t) - R_S^*$ . Therefore

$$\begin{aligned} \mathbb{E}_t[\|\hat{\mathbf{v}}_S(\mathbf{w}_{t+1}) - \hat{\mathbf{v}}_S(\mathbf{w}_t)\|_2^2] &\leq 2L^4/\rho^2\eta_{\mathbf{w},t}^2\|\hat{\mathbf{v}}_S(\mathbf{w}_t) - \mathbf{v}_t\|_2^2 + 4L^2/\rho^2(L + L^2/\rho)\eta_{\mathbf{w},t}^2(R_S(\mathbf{w}_t) - R_S(\mathbf{w}^*)) \\ &\quad + L^2/\rho^2\eta_{\mathbf{w},t}^2(\frac{B_{\mathbf{w}}^2}{m} + d\sigma_{\mathbf{w}}^2). \end{aligned} \quad (11)$$

For the term  $\|\mathbf{v}_{t+1} - \hat{\mathbf{v}}_S(\mathbf{w}_t)\|_2^2$ , by the contraction of projection, we have

$$\begin{aligned} \mathbb{E}_t[\|\mathbf{v}_{t+1} - \hat{\mathbf{v}}_S(\mathbf{w}_t)\|_2^2] &\leq \mathbb{E}_t[\|\mathbf{v}_t + \eta_{\mathbf{v},t}(\frac{1}{m}\sum_{j=1}^m \nabla_{\mathbf{v}}f(\mathbf{w}_t, \mathbf{v}_t; \mathbf{z}_{i_t^j}) + \zeta_t) - \hat{\mathbf{v}}_S(\mathbf{w}_t)\|_2^2] \\ &\leq \|\mathbf{v}_t - \hat{\mathbf{v}}_S(\mathbf{w}_t)\|_2^2 + 2\eta_{\mathbf{v},t}\langle \mathbf{v}_t - \hat{\mathbf{v}}_S(\mathbf{w}_t), \frac{1}{m}\sum_{j=1}^m \nabla_{\mathbf{v}}f(\mathbf{w}_t, \mathbf{v}_t; \mathbf{z}_{i_t^j}) \rangle + \eta_{\mathbf{v},t}^2\mathbb{E}_t[\|\frac{1}{m}\sum_{j=1}^m \nabla_{\mathbf{v}}f(\mathbf{w}_t, \mathbf{v}_t; \mathbf{z}_{i_t^j}) + \zeta_t\|_2^2] \\ &\leq \|\mathbf{v}_t - \hat{\mathbf{v}}_S(\mathbf{w}_t)\|_2^2 + 2\eta_{\mathbf{v},t}\langle \mathbf{v}_t - \hat{\mathbf{v}}_S(\mathbf{w}_t), \nabla_{\mathbf{v}}F_S(\mathbf{w}_t, \mathbf{v}_t) \rangle + \eta_{\mathbf{v},t}^2\|\nabla_{\mathbf{v}}F_S(\mathbf{w}_t, \mathbf{v}_t)\|_2^2 + \eta_{\mathbf{v},t}^2(\frac{B_{\mathbf{v}}^2}{m} + d\sigma_{\mathbf{v}}^2) \\ &\leq (1 - \rho\eta_{\mathbf{v},t})\|\mathbf{v}_t - \hat{\mathbf{v}}_S(\mathbf{w}_t)\|_2^2 + 2\eta_{\mathbf{v},t}(F_S(\mathbf{w}_t, \mathbf{v}_t) - F_S(\mathbf{w}_t, \hat{\mathbf{v}}_S(\mathbf{w}_t))) + \eta_{\mathbf{v},t}^2\|\nabla_{\mathbf{v}}F_S(\mathbf{w}_t, \mathbf{v}_t)\|_2^2 + \eta_{\mathbf{v},t}^2(\frac{B_{\mathbf{v}}^2}{m} + d\sigma_{\mathbf{v}}^2), \end{aligned}$$

where the third inequality we use the  $F_S(\mathbf{w}, \cdot)$  is  $\rho$ -strongly concave. Since  $F_S$  is  $L$ -smooth, by choosing  $\eta_{\mathbf{v},t} \leq 1/L$ , we have

$$\begin{aligned} \mathbb{E}_t[\|\mathbf{v}_{t+1} - \hat{\mathbf{v}}_S(\mathbf{w}_t)\|_2^2] &\leq (1 - \rho\eta_{\mathbf{v},t})\|\mathbf{v}_t - \hat{\mathbf{v}}_S(\mathbf{w}_t)\|_2^2 - \frac{\eta_{\mathbf{v},t}}{L}\|\nabla_{\mathbf{v}}F_S(\mathbf{w}_t, \mathbf{v}_t)\|_2^2 + \eta_{\mathbf{v},t}^2\|\nabla_{\mathbf{v}}F_S(\mathbf{w}_t, \mathbf{v}_t)\|_2^2 + \eta_{\mathbf{v},t}^2(\frac{B_{\mathbf{v}}^2}{m} + d\sigma_{\mathbf{v}}^2) \\ &\leq (1 - \rho\eta_{\mathbf{v},t})\|\mathbf{v}_t - \hat{\mathbf{v}}_S(\mathbf{w}_t)\|_2^2 + \eta_{\mathbf{v},t}^2(\frac{B_{\mathbf{v}}^2}{m} + d\sigma_{\mathbf{v}}^2). \end{aligned} \quad (12)$$

Combining (12) and (11) we have

$$\begin{aligned} \mathbb{E}_t[\|\mathbf{v}_{t+1} - \hat{\mathbf{v}}_S(\mathbf{w}_{t+1})\|_2^2] &\leq ((1 + \frac{1}{\epsilon})2L^4/\rho^2\eta_{\mathbf{w},t}^2 + (1 + \epsilon)(1 - \rho\eta_{\mathbf{v},t}))\|\mathbf{v}_t - \hat{\mathbf{v}}_S(\mathbf{w}_t)\|_2^2 + (1 + \frac{1}{\epsilon})\eta_{\mathbf{w},t}^2L^2/\rho^2(\frac{B_{\mathbf{w}}^2}{m} + d\sigma_{\mathbf{w}}^2) \\ &\quad + (1 + \frac{1}{\epsilon})4L^2/\rho^2(L + L^2/\rho)\eta_{\mathbf{w},t}^2(R_S(\mathbf{w}_t) - R_S(\mathbf{w}^*)) + (1 + \epsilon)\eta_{\mathbf{v},t}^2(\frac{B_{\mathbf{v}}^2}{m} + d\sigma_{\mathbf{v}}^2). \end{aligned}$$

Taking expectation on both sides yields the desired bound. The proof is complete.  $\square$

**Lemma 11.** *Assume (A2) and (A3) hold. Assume  $F_S(\cdot, \mathbf{v})$  satisfies PL condition with constant  $\mu$  and  $F_S(\mathbf{w}, \cdot)$  is  $\rho$ -strongly concave. Define  $a_t = \mathbb{E}[R_S(\mathbf{w}_t) - R_S(\mathbf{w}^*)]$  and  $b_t = \mathbb{E}[\|\hat{\mathbf{v}}_S(\mathbf{w}_t) - \mathbf{v}_t\|_2^2]$ . For Algorithm 1, if  $\eta_{\mathbf{w},t} \leq 1/(L + L^2/\rho)$  and  $\eta_{\mathbf{v},t} \leq 1/L$ , then for any non-increasing sequence  $\{\lambda_t > 0\}$  and  $\epsilon > 0$ , the iterates  $\{\mathbf{w}_t, \mathbf{v}_t\}_{t \in [T]}$  satisfy the following inequality*

$$\begin{aligned} a_{t+1} + \lambda_{t+1}b_{t+1} &\leq k_{1,t}a_t + k_{2,t}\lambda_t b_t \\ &\quad + \frac{(L + L^2/\rho)\eta_{\mathbf{w},t}^2}{2}(\frac{B_{\mathbf{w}}^2}{m} + d\sigma_{\mathbf{w}}^2) + 2(1 + \frac{1}{\epsilon})\lambda_t L^2/\rho^2\eta_{\mathbf{w},t}^2(\frac{B_{\mathbf{w}}^2}{m} + d\sigma_{\mathbf{w}}^2) + \lambda_t(1 + \epsilon)\eta_{\mathbf{v},t}^2(\frac{B_{\mathbf{v}}^2}{m} + d\sigma_{\mathbf{v}}^2), \end{aligned}$$

where

$$\begin{aligned} k_{1,t} &= (1 - \mu\eta_{\mathbf{w},t}) + \lambda_t(1 + \frac{1}{\epsilon})4L^2/\rho^2(L + L^2/\rho)\eta_{\mathbf{w},t}^2, \\ k_{2,t} &= \frac{L^2\eta_{\mathbf{w},t}}{2\lambda_t} + (1 + \epsilon)(1 - \rho\eta_{\mathbf{v},t}) + (1 + \frac{1}{\epsilon})2L^4/\rho^2\eta_{\mathbf{w},t}^2. \end{aligned}$$

*Proof.* Combining Lemma 9 and Lemma 10, we have for any  $\lambda_{t+1} > 0$ , we have

$$\begin{aligned}
a_{t+1} + \lambda_{t+1}b_{t+1} &\leq ((1 - \mu\eta_{\mathbf{w},t}) + \lambda_{t+1}(1 + \frac{1}{\epsilon})4L^2/\rho^2(L + L^2/\rho)\eta_{\mathbf{w},t}^2)a_t \\
&\quad + (\frac{L^2\eta_{\mathbf{w},t}}{2} + \lambda_{t+1}(1 + \epsilon)(1 - \rho\eta_{\mathbf{v},t}) + \lambda_{t+1}(1 + \frac{1}{\epsilon})2L^4/\rho^2\eta_{\mathbf{w},t}^2)b_t \\
&\quad + \frac{(L + L^2/\rho)\eta_{\mathbf{w},t}^2}{2}(\frac{B_{\mathbf{w}}^2}{m} + d\sigma_{\mathbf{w}}^2) + 2(1 + \frac{1}{\epsilon})\lambda_{t+1}L^2/\rho^2\eta_{\mathbf{w},t}^2(\frac{B_{\mathbf{w}}^2}{m} + d\sigma_{\mathbf{w}}^2) + \lambda_{t+1}(1 + \epsilon)\eta_{\mathbf{v},t}^2(\frac{B_{\mathbf{v}}^2}{m} + d\sigma_{\mathbf{v}}^2) \\
&\leq ((1 - \mu\eta_{\mathbf{w},t}) + \lambda_t(1 + \frac{1}{\epsilon})4L^2/\rho^2(L + L^2/\rho)\eta_{\mathbf{w},t}^2)a_t \\
&\quad + (\frac{L^2\eta_{\mathbf{w},t}}{2} + \lambda_t(1 + \epsilon)(1 - \rho\eta_{\mathbf{v},t}) + \lambda_t(1 + \frac{1}{\epsilon})2L^4/\rho^2\eta_{\mathbf{w},t}^2)b_t \\
&\quad + \frac{(L + L^2/\rho)\eta_{\mathbf{w},t}^2}{2}(\frac{B_{\mathbf{w}}^2}{m} + d\sigma_{\mathbf{w}}^2) + 2(1 + \frac{1}{\epsilon})\lambda_tL^2/\rho^2\eta_{\mathbf{w},t}^2(\frac{B_{\mathbf{w}}^2}{m} + d\sigma_{\mathbf{w}}^2) + \lambda_t(1 + \epsilon)\eta_{\mathbf{v},t}^2(\frac{B_{\mathbf{v}}^2}{m} + d\sigma_{\mathbf{v}}^2) \\
&= ((1 - \mu\eta_{\mathbf{w},t}) + \lambda_t(1 + \frac{1}{\epsilon})4L^2/\rho^2(L + L^2/\rho)\eta_{\mathbf{w},t}^2)a_t \\
&\quad + \lambda_t(\frac{L^2\eta_{\mathbf{w},t}}{2\lambda_t} + (1 + \epsilon)(1 - \rho\eta_{\mathbf{v},t}) + (1 + \frac{1}{\epsilon})2L^4/\rho^2\eta_{\mathbf{w},t}^2)b_t \\
&\quad + \frac{(L + L^2/\rho)\eta_{\mathbf{w},t}^2}{2}(\frac{B_{\mathbf{w}}^2}{m} + d\sigma_{\mathbf{w}}^2) + 2(1 + \frac{1}{\epsilon})\lambda_tL^2/\rho^2\eta_{\mathbf{w},t}^2(\frac{B_{\mathbf{w}}^2}{m} + d\sigma_{\mathbf{w}}^2) + \lambda_t(1 + \epsilon)\eta_{\mathbf{v},t}^2(\frac{B_{\mathbf{v}}^2}{m} + d\sigma_{\mathbf{v}}^2).
\end{aligned}$$

where the first inequality we used  $\lambda_{t+1} \leq \lambda_t$ . The proof is completed.  $\square$

We are now ready to state the convergence theorem of Algorithm 1.

**Theorem 3** (Theorem 3 restated). *Assume (A2) and (A3) hold. Assume  $F_S(\cdot, \mathbf{v})$  satisfies PL condition with constant  $\mu$  and  $F_S(\mathbf{w}, \cdot)$  is  $\rho$ -strongly concave. Assume  $\mu \leq 2L^2$  and Let  $\kappa = \frac{L}{\rho}$ . For Algorithm 1, if  $\eta_{\mathbf{w},t} = \mathcal{O}(\frac{1}{\mu t})$  and  $\eta_{\mathbf{v},t} = \mathcal{O}(\frac{\kappa^2 \max\{1, \sqrt{\kappa/\mu}\}}{\mu t^{2/3}})$ , then the iterates  $\{\mathbf{w}_t, \mathbf{v}_t\}_{t \in [T]}$  satisfy the following inequality*

$$\mathbb{E}[R_S(\mathbf{w}_{T+1}) - R_S^*] = \mathcal{O}(\min\left\{\frac{1}{L}, \frac{1}{\mu}\right\}(\frac{B_{\mathbf{w}}^2/m + d\sigma_{\mathbf{w}}^2}{T^{2/3}}) + \max\left\{1, \sqrt{\frac{L\kappa}{\mu}}\right\} \frac{L\kappa^3}{\mu^2}(\frac{B_{\mathbf{v}}^2/m + d\sigma_{\mathbf{v}}^2}{T^{2/3}})). \quad (13)$$

Furthermore, if  $\sigma_{\mathbf{w}}, \sigma_{\mathbf{v}}$  are given by (3), we have

$$\begin{aligned}
&\mathbb{E}[R_S(\mathbf{w}_{T+1}) - R_S^*] \\
&= \mathcal{O}(\min\left\{\frac{1}{L}, \frac{1}{\mu}\right\}(\frac{B_{\mathbf{w}}^2}{mT^{2/3}} + \frac{G_{\mathbf{w}}^2 dT^{1/3} \log(1/\delta)}{n^2 \epsilon^2}) + \max\left\{1, \sqrt{\frac{L\kappa}{\mu}}\right\} \frac{L\kappa^3}{\mu^2}(\frac{B_{\mathbf{v}}^2}{mT^{2/3}} + \frac{G_{\mathbf{v}}^2 dT^{1/3} \log(1/\delta)}{n^2 \epsilon^2})). \quad (14)
\end{aligned}$$

*Proof.* Since  $\eta_{\mathbf{v},t} \leq 1/L$ , we can pick  $\epsilon = \frac{\rho\eta_{\mathbf{v},t}}{2(1-\rho\eta_{\mathbf{v},t})}$ . Then we have  $(1 + \epsilon)(1 - \rho\eta_{\mathbf{v},t}) = 1 - \frac{\rho\eta_{\mathbf{v},t}}{2}$  and  $1 + \frac{1}{\epsilon} \leq \frac{2}{\rho\eta_{\mathbf{v},t}}$ . Therefore Lemma 11 can be simplified as

$$\begin{aligned}
k_{1,t} &\leq (1 - \mu\eta_{\mathbf{w},t}) + \lambda_t \frac{8L^2/\rho^2(L + L^2/\rho)\eta_{\mathbf{w},t}^2}{\rho\eta_{\mathbf{v},t}}, \\
k_{2,t} &\leq \frac{L^2\eta_{\mathbf{w},t}}{2\lambda_t} + 1 - \frac{\rho\eta_{\mathbf{v},t}}{2} + \frac{4L^4/\rho^2\eta_{\mathbf{w},t}^2}{\rho\eta_{\mathbf{v},t}}.
\end{aligned}$$

If we choose  $\lambda_t = \frac{4L^2\eta_{\mathbf{w},t}}{\rho\eta_{\mathbf{v},t}}$  and  $\eta_{\mathbf{w},t} \leq \min\{\frac{\sqrt{\mu}}{8\kappa^2\sqrt{L+L^2/\rho}}, \frac{1}{4\sqrt{2}\kappa^2}\}\eta_{\mathbf{v},t}$ , then further we have  $k_{1,t} \leq 1 - \frac{\mu\eta_{\mathbf{w},t}}{2}$

and  $k_{2,t} \leq 1 - \frac{\rho\eta_{\mathbf{v},t}}{4}$ . By Lemma 11 we have

$$\begin{aligned} a_{t+1} + \lambda_{t+1}b_{t+1} &\leq (1 - \min\{\frac{\mu}{2}, L^2\}\eta_{\mathbf{w},t})(a_t + \lambda_t b_t) + \frac{(L + L^2/\rho)\eta_{\mathbf{w},t}^2}{2}(\frac{B_{\mathbf{w}}^2}{m} + d\sigma_{\mathbf{w}}^2) \\ &\quad + \frac{16L^4/\rho^3\eta_{\mathbf{w},t}^3}{\rho\eta_{\mathbf{v},t}^2}(\frac{B_{\mathbf{w}}^2}{m} + d\sigma_{\mathbf{w}}^2) + \frac{4L^2(2 - \rho\eta_{\mathbf{v},t})\eta_{\mathbf{w},t}\eta_{\mathbf{v},t}}{2\rho(1 - \rho\eta_{\mathbf{v},t})}(\frac{B_{\mathbf{v}}^2}{m} + d\sigma_{\mathbf{v}}^2) \\ &\leq (1 - \frac{\mu\eta_{\mathbf{w},t}}{2})(a_t + \lambda_t b_t) + \frac{(L + L^2/\rho)\eta_{\mathbf{w},t}^2}{2}(\frac{B_{\mathbf{w}}^2}{m} + d\sigma_{\mathbf{w}}^2) \\ &\quad + \frac{16L^4/\rho^3\eta_{\mathbf{w},t}^3}{\rho\eta_{\mathbf{v},t}^2}(\frac{B_{\mathbf{w}}^2}{m} + d\sigma_{\mathbf{w}}^2) + \frac{4L^2(2 - \rho\eta_{\mathbf{v},t})\eta_{\mathbf{w},t}\eta_{\mathbf{v},t}}{2\rho(1 - \rho\eta_{\mathbf{v},t})}(\frac{B_{\mathbf{v}}^2}{m} + d\sigma_{\mathbf{v}}^2), \end{aligned}$$

where we used  $\mu \leq 2L^2$ . Taking  $\eta_{\mathbf{w},t} = \frac{\mu}{\mu t}$  and  $\eta_{\mathbf{v},t} = \max\{8\kappa^2\sqrt{(L + L^2/\rho)/\mu}, 4\sqrt{2}\kappa^2\}\frac{2}{\mu t^{2/3}}$  and multiplying the preceding inequality with  $t$  on both sides, there holds

$$\begin{aligned} t(a_{t+1} + \lambda_{t+1}b_{t+1}) &\leq (t-1)(a_t + \lambda_t b_t) + \frac{2(L + L^2/\rho)}{\mu^2 t}(\frac{B_{\mathbf{w}}^2}{m} + d\sigma_{\mathbf{w}}^2) \\ &\quad + \frac{32L^4/\rho^3 \min\{\frac{\sqrt{\mu}}{8\kappa^2\sqrt{L+L^2/\rho}}, \frac{1}{4\sqrt{2}\kappa^2}\}^2}{\mu\rho t^{2/3}}(\frac{B_{\mathbf{w}}^2}{m} + d\sigma_{\mathbf{w}}^2) + \frac{16L^2 \max\{8\kappa^2\sqrt{(L + L^2/\rho)/\mu}, 4\sqrt{2}\kappa^2\}}{2\mu^2\rho t^{2/3}}(\frac{B_{\mathbf{v}}^2}{m} + d\sigma_{\mathbf{v}}^2). \end{aligned}$$

Applying the preceding inequality inductively from  $t = 1$  to  $T$ , we have

$$\begin{aligned} T(a_{T+1} + \lambda_{T+1}b_{T+1}) &\leq \frac{2(L + L^2/\rho)}{\mu^2}(\frac{B_{\mathbf{w}}^2}{m} + d\sigma_{\mathbf{w}}^2)\log(T) + \frac{32L^4/\rho^3 \min\{\frac{\sqrt{\mu}}{8\kappa^2\sqrt{L+L^2/\rho}}, \frac{1}{4\sqrt{2}\kappa^2}\}^2}{\mu\rho}(\frac{B_{\mathbf{w}}^2}{m} + d\sigma_{\mathbf{w}}^2)T^{1/3} \\ &\quad + \frac{16L^2 \max\{8\kappa^2\sqrt{(L + L^2/\rho)/\mu}, 4\sqrt{2}\kappa^2\}}{2\mu^2\rho}(\frac{B_{\mathbf{v}}^2}{m} + d\sigma_{\mathbf{v}}^2)T^{1/3}. \end{aligned}$$

Consequently,

$$\begin{aligned} \mathbb{E}[R_S(\mathbf{w}_{T+1}) - R_S^*] &\leq a_{T+1} + \lambda_{T+1}b_{T+1} \\ &\leq \frac{2(L + L^2/\rho)(B_{\mathbf{w}}^2/m + d\sigma_{\mathbf{w}}^2)\log(T)}{\mu^2} + \frac{32(B_{\mathbf{w}}^2/m + d\sigma_{\mathbf{w}}^2)L^4/\rho^3 \min\{\frac{\sqrt{\mu}}{8\kappa^2\sqrt{L+L^2/\rho}}, \frac{1}{4\sqrt{2}\kappa^2}\}^2}{\mu\rho} \frac{1}{T^{2/3}} \\ &\quad + \frac{16(B_{\mathbf{v}}^2/m + d\sigma_{\mathbf{v}}^2)L^2 \max\{8\kappa^2\sqrt{(L + L^2/\rho)/\mu}, 4\sqrt{2}\kappa^2\}}{2\mu^2\rho} \frac{1}{T^{2/3}}. \end{aligned} \quad (15)$$

Therefore, the estimation (13) follows from the fact that  $\kappa = L/\rho$ .

The result in Theorem 3 follows by observing  $\max\{1, \sqrt{\frac{L\kappa}{\mu}}\} \frac{L\kappa^3}{\mu^2} \geq \min\{\frac{1}{L}, \frac{1}{\mu}\}$ . Substituting the values of  $\sigma_{\mathbf{w}}, \sigma_{\mathbf{v}}$ , i.e.,  $\sigma_{\mathbf{w}} = \frac{c_2 G_{\mathbf{w}} \sqrt{T \log(\frac{1}{\delta})}}{n\epsilon}$  and  $\sigma_{\mathbf{v}} = \frac{c_3 G_{\mathbf{v}} \sqrt{T \log(\frac{1}{\delta})}}{n\epsilon}$ , into (13) yields the desired estimation (14).  $\square$

## D.2 Proof of Theorem 4 (Generalization Error)

We first focus on to the generalization error  $\mathbb{E}[R(\mathbf{w}_T) - R_S(\mathbf{w}_T)]$ . Firstly, we introduce a lemma that bridges the generalization and the uniform argument stability. We modify the lemma so that it satisfies our needs.

**Lemma 12** ([Lei et al., 2021]). *Let  $A$  be a randomized algorithm and  $\epsilon > 0$ . If for all neighboring datasets  $S, S'$ , there holds*

$$\mathbb{E}_A[\|A_{\mathbf{w}}(S) - A_{\mathbf{w}}(S')\|_2] \leq \epsilon.$$

Furthermore, if the function  $F(\mathbf{w}, \cdot)$  is  $\rho$ -strongly-concave and Assumptions 1, **(A3)** hold, then the primal generalization error satisfies

$$\mathbb{E}_{S,A}[R(A_{\mathbf{w}}(S)) - R_S(A_{\mathbf{w}}(S))] \leq (1 + L/\rho)G_{\mathbf{w}}\epsilon.$$

The next proposition states the set of saddle points is unique with respect to the variable  $\mathbf{v}$  when  $F_S(\mathbf{w}, \cdot)$  is strongly concave.

**Proposition 1.** *Assume  $F_S(\mathbf{w}, \cdot)$  is  $\rho$ -strongly concave with  $\rho > 0$ . Let  $(\hat{\mathbf{w}}_S, \hat{\mathbf{v}}_S)$  and  $(\hat{\mathbf{w}}'_S, \hat{\mathbf{v}}'_S)$  be two saddle points of  $F_S$ . Then we have  $\hat{\mathbf{v}}_S = \hat{\mathbf{v}}'_S$ .*

*Proof.* Given  $\hat{\mathbf{w}}_S$ , by the strong concavity, we have

$$F_S(\hat{\mathbf{w}}_S, \hat{\mathbf{v}}_S) \geq F_S(\hat{\mathbf{w}}_S, \hat{\mathbf{v}}'_S) + \langle \nabla_{\mathbf{v}} F_S(\hat{\mathbf{w}}_S, \hat{\mathbf{v}}_S), \hat{\mathbf{v}}_S - \hat{\mathbf{v}}'_S \rangle + \frac{\rho}{2} \|\hat{\mathbf{v}}_S - \hat{\mathbf{v}}'_S\|_2^2.$$

Since  $(\hat{\mathbf{w}}_S, \hat{\mathbf{v}}_S)$  is a saddle point of  $F_S$ , it implies  $\hat{\mathbf{v}}_S$  attains maximum of  $F_S(\hat{\mathbf{w}}_S, \cdot)$ . By the first order optimality we know  $\langle \nabla_{\mathbf{v}} F_S(\hat{\mathbf{w}}_S, \hat{\mathbf{v}}_S), \hat{\mathbf{v}}_S - \hat{\mathbf{v}}'_S \rangle \geq 0$  and therefore

$$F_S(\hat{\mathbf{w}}_S, \hat{\mathbf{v}}_S) \geq F_S(\hat{\mathbf{w}}_S, \hat{\mathbf{v}}'_S) + \frac{\rho}{2} \|\hat{\mathbf{v}}_S - \hat{\mathbf{v}}'_S\|_2^2 \geq F_S(\hat{\mathbf{w}}'_S, \hat{\mathbf{v}}'_S) + \frac{\rho}{2} \|\hat{\mathbf{v}}_S - \hat{\mathbf{v}}'_S\|_2^2, \quad (16)$$

where in the second inequality we used  $(\hat{\mathbf{w}}'_S, \hat{\mathbf{v}}'_S)$  is also a saddle point of  $F_S$ . Similarly, given  $\hat{\mathbf{w}}'_S$  we can show

$$F_S(\hat{\mathbf{w}}'_S, \hat{\mathbf{v}}'_S) \geq F_S(\hat{\mathbf{w}}_S, \hat{\mathbf{v}}_S) + \frac{\rho}{2} \|\hat{\mathbf{v}}_S - \hat{\mathbf{v}}'_S\|_2^2. \quad (17)$$

Adding (16) and (17) together implies that  $\rho \|\hat{\mathbf{v}}_S - \hat{\mathbf{v}}'_S\|_2^2 \leq 0$ . This implies  $\hat{\mathbf{v}}_S = \hat{\mathbf{v}}'_S$  which completes the proof.  $\square$

Recall that  $\pi_S : \mathcal{W} \rightarrow \mathcal{W}$  is the projection onto the set of saddle points  $\Omega_S = \{(\hat{\mathbf{w}}_S, \hat{\mathbf{v}}_S) \in \arg \min \max F_S(\mathbf{w}, \mathbf{v})\}$ . i.e.  $\pi_S(\mathbf{w}) = \arg \min_{(\hat{\mathbf{w}}_S, \hat{\mathbf{v}}_S) \in \Omega_S} \frac{1}{2} \|\mathbf{w} - \hat{\mathbf{w}}_S\|_2^2$ . Proposition 1 makes sure the projection is well-defined. The next lemma shows that PL condition implies quadratic growth (QG) condition. The proof follows straightforward from Karimi et al. [2016] and we omit it for brevity.

**Lemma 13.** *Suppose the function  $F_S(\cdot, \mathbf{v})$  satisfies  $\mu$ -PL condition. Then  $F_S$  satisfies the QG condition with respect to  $\mathbf{w}$  with constant  $4\mu$ , i.e.*

$$F_S(\mathbf{w}, \mathbf{v}) - F_S(\pi_S(\mathbf{w}), \mathbf{v}) \geq 2\mu \|\mathbf{w} - \pi_S(\mathbf{w})\|_2^2, \quad \forall \mathbf{v} \in \mathcal{V}$$

With the help of Assumption 4 and the preceding lemmas, we can derive the uniform argument stability.

**Lemma 14.** *Assume (A1), (A3) and (A4) hold. Assume  $F_S(\cdot, \mathbf{v})$  satisfies PL condition with constant  $\mu$  and  $F_S(\mathbf{w}, \cdot)$  is  $\rho$ -strongly concave. Let  $A$  be a randomized algorithm. If for any  $S$ ,  $\mathbb{E}[\|A_{\mathbf{w}}(S) - \pi_S(A_{\mathbf{w}}(S))\|_2] = \mathcal{O}(\varepsilon_A)$ , then we have*

$$\mathbb{E}[\|A_{\mathbf{w}}(S) - A_{\mathbf{w}}(S')\|_2] \leq \mathcal{O}(\varepsilon_A) + \frac{1}{n} \sqrt{\frac{G_{\mathbf{w}}^2}{4\mu^2} + \frac{G_{\mathbf{v}}^2}{\rho\mu}}.$$

*Proof.* Let  $(\pi_S(A_{\mathbf{w}}(S)), \hat{\mathbf{v}}_S) \in \arg \min_{\mathbf{w}} \max_{\mathbf{v}} F_S(\mathbf{w}, \mathbf{v})$  and  $(\pi_{S'}(A_{\mathbf{w}}(S')), \hat{\mathbf{v}}_{S'})$  defined in the similar way. By triangle inequality we have

$$\begin{aligned} \mathbb{E}[\|A_{\mathbf{w}}(S) - A_{\mathbf{w}}(S')\|_2] &\leq \mathbb{E}[\|A_{\mathbf{w}}(S) - \pi_S(A_{\mathbf{w}}(S))\|_2] + \|\pi_S(A_{\mathbf{w}}(S)) - \pi_{S'}(A_{\mathbf{w}}(S'))\|_2 + \mathbb{E}[\|A_{\mathbf{w}}(S') - \pi_{S'}(A_{\mathbf{w}}(S'))\|_2] \\ &= \|\pi_S(A_{\mathbf{w}}(S)) - \pi_{S'}(A_{\mathbf{w}}(S'))\|_2 + \mathcal{O}(\varepsilon_A). \end{aligned}$$

Since  $\pi_S(A_{\mathbf{w}}(S)) \in \arg \min_{\mathbf{w} \in \mathcal{W}} F_S(\mathbf{w}, \hat{\mathbf{v}}_S)$  and by Assumption (A4) we know that  $\pi_S(A_{\mathbf{w}}(S))$  is the closest optimal point of  $F_S$  to  $\pi_{S'}(A_{\mathbf{w}}(S'))$ . And since  $\hat{\mathbf{v}}_S$  is fixed, by Lemma 13, we have

$$2\mu \|\pi_S(A_{\mathbf{w}}(S)) - \pi_{S'}(A_{\mathbf{w}}(S'))\|_2^2 \leq F_S(\pi_{S'}(A_{\mathbf{w}}(S')), \hat{\mathbf{v}}_S) - F_S(\pi_S(A_{\mathbf{w}}(S)), \hat{\mathbf{v}}_S).$$

Similarly, we have

$$2\mu \|\pi_S(A_{\mathbf{w}}(S)) - \pi_{S'}(A_{\mathbf{w}}(S'))\|_2^2 \leq F_{S'}(\pi_S(A_{\mathbf{w}}(S)), \hat{\mathbf{v}}_{S'}) - F_{S'}(\pi_{S'}(A_{\mathbf{w}}(S')), \hat{\mathbf{v}}_{S'}).$$

Summing up the above two inequalities we have

$$4\mu\|\pi_S(A_{\mathbf{w}}(S)) - \pi_{S'}(A_{\mathbf{w}}(S'))\|_2^2 \leq F_S(\pi_{S'}(A_{\mathbf{w}}(S')), \hat{\mathbf{v}}_S) - F_S(\pi_S(A_{\mathbf{w}}(S)), \hat{\mathbf{v}}_S) \\ + F_{S'}(\pi_S(A_{\mathbf{w}}(S)), \hat{\mathbf{v}}_{S'}) - F_{S'}(\pi_{S'}(A_{\mathbf{w}}(S')), \hat{\mathbf{v}}_{S'}). \quad (18)$$

On the other hand, by the  $\rho$ -strong concavity of  $F_S(\cdot, \mathbf{v})$  and  $\hat{\mathbf{v}}_S = \arg \max_{\mathbf{v} \in \mathcal{V}} F_S(\pi_S(A_{\mathbf{w}}(S)), \mathbf{v})$ , we have

$$\frac{\rho}{2}\|\hat{\mathbf{v}}_S - \hat{\mathbf{v}}_{S'}\|_2^2 \leq F_S(\pi_S(A_{\mathbf{w}}(S)), \hat{\mathbf{v}}_S) - F_S(\pi_S(A_{\mathbf{w}}(S)), \hat{\mathbf{v}}_{S'}).$$

Similarly, we have

$$\frac{\rho}{2}\|\hat{\mathbf{v}}_S - \hat{\mathbf{v}}_{S'}\|_2^2 \leq F_{S'}(\pi_{S'}(A_{\mathbf{w}}(S')), \hat{\mathbf{v}}_{S'}) - F_{S'}(\pi_{S'}(A_{\mathbf{w}}(S')), \hat{\mathbf{v}}_S).$$

Summing up the above two inequalities we have

$$\rho\|\hat{\mathbf{v}}_S - \hat{\mathbf{v}}_{S'}\|_2^2 \leq F_S(\pi_S(A_{\mathbf{w}}(S)), \hat{\mathbf{v}}_S) - F_S(\pi_S(A_{\mathbf{w}}(S)), \hat{\mathbf{v}}_{S'}) \\ + F_{S'}(\pi_{S'}(A_{\mathbf{w}}(S')), \hat{\mathbf{v}}_{S'}) - F_{S'}(\pi_{S'}(A_{\mathbf{w}}(S')), \hat{\mathbf{v}}_S). \quad (19)$$

Summing up (18) and (19) rearranging terms, we have

$$4\mu\|\pi_S(A_{\mathbf{w}}(S)) - \pi_{S'}(A_{\mathbf{w}}(S'))\|_2^2 + \rho\|\hat{\mathbf{v}}_S - \hat{\mathbf{v}}_{S'}\|_2^2 \\ \leq F_S(\pi_{S'}(A_{\mathbf{w}}(S')), \hat{\mathbf{v}}_S) - F_{S'}(\pi_{S'}(A_{\mathbf{w}}(S')), \hat{\mathbf{v}}_S) + F_{S'}(\pi_S(A_{\mathbf{w}}(S)), \hat{\mathbf{v}}_{S'}) - F_S(\pi_S(A_{\mathbf{w}}(S)), \hat{\mathbf{v}}_{S'}) \\ = \frac{1}{n}(f(\pi_{S'}(A_{\mathbf{w}}(S')), \hat{\mathbf{v}}_S; \mathbf{z}) - f(\pi_{S'}(A_{\mathbf{w}}(S')), \hat{\mathbf{v}}_S; \mathbf{z}') + f(\pi_S(A_{\mathbf{w}}(S)), \hat{\mathbf{v}}_{S'}; \mathbf{z}') - f(\pi_S(A_{\mathbf{w}}(S)), \hat{\mathbf{v}}_{S'}; \mathbf{z})) \\ \leq \frac{2G_{\mathbf{w}}}{n}\|\pi_S(A_{\mathbf{w}}(S)) - \pi_{S'}(A_{\mathbf{w}}(S'))\|_2 + \frac{2G_{\mathbf{v}}}{n}\|\hat{\mathbf{v}}_S - \hat{\mathbf{v}}_{S'}\|_2 \\ \leq \frac{1}{n}\sqrt{\frac{G_{\mathbf{w}}^2}{\mu} + \frac{4G_{\mathbf{v}}^2}{\rho}} \times \sqrt{4\mu\|\pi_S(A_{\mathbf{w}}(S)) - \pi_{S'}(A_{\mathbf{w}}(S'))\|_2^2 + \rho\|\hat{\mathbf{v}}_S - \hat{\mathbf{v}}_{S'}\|_2^2},$$

where the second inequality is due to Lipschitz continuity of  $f$ , the third inequality is due to Cauchy-Schwartz inequality. Therefore

$$2\sqrt{\mu}\|\pi_S(A_{\mathbf{w}}(S)) - \pi_{S'}(A_{\mathbf{w}}(S'))\|_2 \leq \sqrt{4\mu\|\pi_S(A_{\mathbf{w}}(S)) - \pi_{S'}(A_{\mathbf{w}}(S'))\|_2^2 + \rho\|\hat{\mathbf{v}}_S - \hat{\mathbf{v}}_{S'}\|_2^2} \leq \frac{1}{n}\sqrt{\frac{G_{\mathbf{w}}^2}{\mu} + \frac{4G_{\mathbf{v}}^2}{\rho}}.$$

The proof is complete.  $\square$

We are now ready to present the generalization error of Algorithm 1 in terms of  $\mathbf{w}_T$ .

**Theorem 4.** *Assume (A1), (A3) and (A4) hold. Assume  $F_S(\cdot, \mathbf{v})$  satisfies PL condition with constant  $\mu$  and  $f(\mathbf{w}, \cdot; \mathbf{z})$  is  $\rho$ -strongly concave. For Algorithm 1, the iterates  $\{\mathbf{w}_t, \mathbf{v}_t\}$  satisfies the following inequality*

$$\mathbb{E}[R(\mathbf{w}_T) - R_S(\mathbf{w}_T)] \leq (1 + \frac{L}{\rho})G_{\mathbf{w}}\left(\sqrt{\frac{\varepsilon_T}{2\mu}} + \frac{1}{n}\sqrt{\frac{G_{\mathbf{w}}^2}{4\mu^2} + \frac{G_{\mathbf{v}}^2}{\rho\mu}}\right).$$

*Proof.* Since  $R_S$  satisfies  $\mu$ -PL, by Lemma 13 and Theorem 3, we have

$$\mathbb{E}[\|\mathbf{w}_T - \pi(\mathbf{w}_T)\|_2] \leq \sqrt{\mathbb{E}[\|\mathbf{w}_T - \pi(\mathbf{w}_T)\|_2^2]} \leq \sqrt{\mathbb{E}[\frac{1}{2\mu}(R_S(\mathbf{w}_T) - R_S^*)]} \leq \sqrt{\frac{\varepsilon_T}{2\mu}}.$$

By Lemma 14, we have

$$\mathbb{E}[\|\mathbf{w}_T - \mathbf{w}'_T\|_2] \leq \sqrt{\frac{\varepsilon_T}{2\mu}} + \frac{1}{n}\sqrt{\frac{G_{\mathbf{w}}^2}{4\mu^2} + \frac{G_{\mathbf{v}}^2}{\rho\mu}}.$$

By Part b) of Lemma 12, we have

$$\mathbb{E}[R(\mathbf{w}_T) - R_S(\mathbf{w}_T)] \leq (1 + \frac{L}{\rho})G_{\mathbf{w}}\left(\sqrt{\frac{\varepsilon_T}{2\mu}} + \frac{1}{n}\sqrt{\frac{G_{\mathbf{w}}^2}{4\mu^2} + \frac{G_{\mathbf{v}}^2}{\rho\mu}}\right).$$

The proof is complete.  $\square$



The next theorem establishes the generalization bound for the empirical maximizer of a strongly concave objective, i.e.  $\mathbb{E}[R_S(\mathbf{w}^*) - R(\mathbf{w}^*)]$ . The proof follows from Shalev-Shwartz et al. [2009].

**Theorem 5.** *Assume (A1) holds. Assume  $F_S(\mathbf{w}, \cdot)$  is  $\rho$ -strongly concave. Assume that for any  $\mathbf{w}$  and  $S$ , the function  $\mathbf{v} \mapsto F_S(\mathbf{w}, \mathbf{v})$  is  $\rho$ -strongly-concave. Then*

$$\mathbb{E}[R_S(\mathbf{w}^*) - R(\mathbf{w}^*)] \leq \frac{4G_{\mathbf{v}}^2}{\rho n}.$$

*Proof.* We decompose the term  $\mathbb{E}[R_S(\mathbf{w}^*) - R(\mathbf{w}^*)]$  as

$$\mathbb{E}[R_S(\mathbf{w}^*) - R(\mathbf{w}^*)] = \mathbb{E}[F_S(\mathbf{w}^*, \hat{\mathbf{v}}_S^*) - F(\mathbf{w}^*, \mathbf{v}^*)] = \mathbb{E}[F_S(\mathbf{w}^*, \hat{\mathbf{v}}_S^*) - F(\mathbf{w}^*, \hat{\mathbf{v}}_S^*)] + \mathbb{E}[F(\mathbf{w}^*, \hat{\mathbf{v}}_S^*) - F(\mathbf{w}^*, \mathbf{v}^*)],$$

where  $\hat{\mathbf{v}}_S^* = \arg \max_{\mathbf{v}} F_S(\mathbf{w}^*, \mathbf{v})$ . The second term  $\mathbb{E}[F(\mathbf{w}^*, \hat{\mathbf{v}}_S^*) - F(\mathbf{w}^*, \mathbf{v}^*)] \leq 0$  since  $(\mathbf{w}^*, \mathbf{v}^*)$  is a saddle point of  $F$ . Hence it suffices to bound  $\mathbb{E}[F_S(\mathbf{w}^*, \hat{\mathbf{v}}_S^*) - F(\mathbf{w}^*, \hat{\mathbf{v}}_S^*)]$ . Let  $S' = \{z'_1, \dots, z'_n\}$  be drawn independently from  $\rho$ . For any  $i \in [n]$ , define  $S^{(i)} = \{z_1, \dots, z_{i-1}, z'_i, z_{i+1}, \dots, z_n\}$ . Denote  $\hat{\mathbf{v}}_{S^{(i)}}^* = \arg \max_{\mathbf{v} \in \mathcal{V}} F_{S^{(i)}}(\mathbf{w}^*, \mathbf{v})$ . Then

$$\begin{aligned} F_S(\mathbf{w}^*, \hat{\mathbf{v}}_S^*) - F_S(\mathbf{w}^*, \hat{\mathbf{v}}_{S^{(i)}}^*) &= \frac{1}{n} \sum_{j \neq i} \left( f(\mathbf{w}^*, \hat{\mathbf{v}}_S^*; z_j) - f(\mathbf{w}^*, \hat{\mathbf{v}}_{S^{(i)}}^*; z_j) \right) + \frac{1}{n} \left( f(\mathbf{w}^*, \hat{\mathbf{v}}_S^*; z_i) - f(\mathbf{w}^*, \hat{\mathbf{v}}_{S^{(i)}}^*; z_i) \right) \\ &= \frac{1}{n} \left( f(\mathbf{w}^*, \hat{\mathbf{v}}_{S^{(i)}}^*; z'_i) - f(\mathbf{w}^*, \hat{\mathbf{v}}_S^*; z'_i) \right) + \frac{1}{n} \left( f(\mathbf{w}^*, \hat{\mathbf{v}}_S^*; z_i) - f(\mathbf{w}^*, \hat{\mathbf{v}}_{S^{(i)}}^*; z_i) \right) \\ &\quad + F_{S^{(i)}}(\mathbf{w}^*, \hat{\mathbf{v}}_S^*) - F_{S^{(i)}}(\mathbf{w}^*, \hat{\mathbf{v}}_{S^{(i)}}^*) \\ &\leq \frac{1}{n} \left( f(\mathbf{w}^*, \hat{\mathbf{v}}_{S^{(i)}}^*; z'_i) - f(\mathbf{w}^*, \hat{\mathbf{v}}_S^*; z'_i) \right) + \frac{1}{n} \left( f(\mathbf{w}^*, \hat{\mathbf{v}}_S^*; z_i) - f(\mathbf{w}^*, \hat{\mathbf{v}}_{S^{(i)}}^*; z_i) \right) \\ &\leq \frac{2G_{\mathbf{v}}}{n} \|\hat{\mathbf{v}}_S^* - \hat{\mathbf{v}}_{S^{(i)}}^*\|_2, \end{aligned} \tag{20}$$

where the first inequality follows from the fact that  $\hat{\mathbf{v}}_{S^{(i)}}^*$  is the maximizer of  $F_{S^{(i)}}(\mathbf{w}^*, \cdot)$  and the second inequality follows the Lipschitz continuity. Since  $F_S$  is strongly-concave and  $\hat{\mathbf{v}}_S^*$  maximizes  $F_S(\mathbf{w}^*, \cdot)$ , we know

$$\frac{\rho}{2} \|\hat{\mathbf{v}}_S^* - \hat{\mathbf{v}}_{S^{(i)}}^*\|_2^2 \leq F_S(\mathbf{w}^*, \hat{\mathbf{v}}_S^*) - F_S(\mathbf{w}^*, \hat{\mathbf{v}}_{S^{(i)}}^*).$$

Combining it with (20) we get  $\|\hat{\mathbf{v}}_S^* - \hat{\mathbf{v}}_{S^{(i)}}^*\|_2 \leq 4G_{\mathbf{v}}/(\rho n)$ . By Lipschitz continuity, the following inequality holds for any  $z$

$$|f(\mathbf{w}^*, \hat{\mathbf{v}}_S^*; z) - f(\mathbf{w}^*, \hat{\mathbf{v}}_{S^{(i)}}^*; z)| \leq \frac{4G_{\mathbf{v}}^2}{\rho n}.$$

Since  $z_i$  and  $z'_i$  are i.i.d., we have

$$\mathbb{E}[F(\mathbf{w}^*, \hat{\mathbf{v}}_S^*)] = \mathbb{E}[F(\mathbf{w}^*, \hat{\mathbf{v}}_{S^{(i)}}^*)] = \frac{1}{n} \sum_{i=1}^n \mathbb{E}[f(\mathbf{w}^*, \hat{\mathbf{v}}_{S^{(i)}}^*; z_i)],$$

where the last identity holds since  $z_i$  is independent of  $\hat{\mathbf{v}}_{S^{(i)}}^*$ . Therefore

$$\mathbb{E}[F_S(\mathbf{w}^*, \hat{\mathbf{v}}_S^*) - F(\mathbf{w}^*, \hat{\mathbf{v}}_S^*)] = \frac{1}{n} \sum_{i=1}^n \mathbb{E}[f(\mathbf{w}^*, \hat{\mathbf{v}}_S^*; z_i) - f(\mathbf{w}^*, \hat{\mathbf{v}}_{S^{(i)}}^*; z_i)] \leq \frac{4G_{\mathbf{v}}^2}{\rho n}.$$

The proof is complete.  $\square$

**Theorem 6** (Theorem 4 restated). *Assume the function  $f(\mathbf{w}, \cdot; \mathbf{z})$  is  $\rho$ -strongly concave and  $F_S(\cdot, \mathbf{v})$  satisfies  $\mu$ -PL condition. Suppose (A1) and (A3) hold. If  $\mathbb{E}[R_S(\mathbf{w}_{T+1}) - R_S^*] \leq \varepsilon_T$ , then*

$$\mathbb{E}[R(\mathbf{w}_T) - R_S(\mathbf{w}_T)] \leq (1 + \kappa)G_{\mathbf{w}} \left( \sqrt{\frac{\varepsilon_T}{2\mu}} + \frac{1}{n} \sqrt{\frac{G_{\mathbf{w}}^2}{4\mu^2} + \frac{G_{\mathbf{v}}^2}{\rho\mu}} \right),$$

and

$$\mathbb{E}[R_S(\mathbf{w}^*) - R(\mathbf{w}^*)] \leq \frac{4G_{\mathbf{v}}^2}{\rho n}.$$

*Proof.* It follows directly from Theorem 4 and 5.  $\square$

### D.3 Proof of Theorem 5

**Theorem 7** (Theorem 5 restated). *Assume (A1), (A3) and (A4) hold. Assume  $F_S(\cdot, \mathbf{v})$  satisfies PL condition with constant  $\mu$  and  $f(\mathbf{w}, \cdot; \mathbf{z})$  is  $\rho$ -strongly concave. For SGDA, if  $\mathbb{E}[R_S(\mathbf{w}_T) - R_S^*] = \mathcal{O}(\varepsilon_T)$ , then iterates  $\{\mathbf{w}_t, \mathbf{v}_t\}$  satisfies the following inequality*

$$\mathbb{E}[R(\mathbf{w}_T) - R^*] = \mathcal{O}(\varepsilon_T + (1 + \frac{L}{\rho})G_{\mathbf{w}} \left( \sqrt{\frac{\varepsilon_T}{2\mu}} + \frac{1}{n} \sqrt{\frac{G_{\mathbf{w}}^2}{4\mu^2} + \frac{G_{\mathbf{v}}^2}{\rho\mu}} \right) + \frac{4G_{\mathbf{v}}^2}{\rho n}).$$

Furthermore, if we choose  $T = \mathcal{O}(n)$ ,  $\eta_{\mathbf{w},t} = \mathcal{O}(\frac{1}{\mu t})$  and  $\eta_{\mathbf{v},t} = \mathcal{O}(\frac{\kappa^2 \max\{1, \sqrt{\kappa/\mu}\}}{\mu t^{2/3}})$ , then

$$\mathbb{E}[R(\mathbf{w}_T) - R^*] = \mathcal{O}\left(\frac{\kappa^{2.75}}{\mu^{1.75}} \left( \frac{1}{n^{1/3}} + \frac{\sqrt{d \log(1/\delta)}}{n^{5/6} \epsilon} \right)\right).$$

*Proof.* For any  $\mathbf{w}^* \in \arg \min_{\mathbf{w}} R(\mathbf{w})$ , recall that we have the error decomposition (5), which is

$$\begin{aligned} \mathbb{E}[R(\mathbf{w}_T) - R^*] &= \mathbb{E}[R(\mathbf{w}_T) - R_S(\mathbf{w}_T)] + \mathbb{E}[R_S(\mathbf{w}_T) - R_S^*] + \mathbb{E}[R_S^* - R_S(\mathbf{w}^*)] + \mathbb{E}[R_S(\mathbf{w}^*) - R(\mathbf{w}^*)] \\ &\leq \mathbb{E}[R(\mathbf{w}_T) - R_S(\mathbf{w}_T)] + \mathbb{E}[R_S(\mathbf{w}_T) - R_S^*] + \mathbb{E}[R_S(\mathbf{w}^*) - R(\mathbf{w}^*)], \end{aligned}$$

where the inequality is by  $R_S^* - R_S(\mathbf{w}^*) \leq 0$ . By Theorem 4, we have

$$\mathbb{E}[R(\mathbf{w}_T) - R_S(\mathbf{w}_T)] \leq (1 + \frac{L}{\rho})G_{\mathbf{w}} \left( \sqrt{\frac{\varepsilon_T}{2\mu}} + \frac{1}{n} \sqrt{\frac{G_{\mathbf{w}}^2}{4\mu^2} + \frac{G_{\mathbf{v}}^2}{\rho\mu}} \right).$$

And by Theorem 5, we have

$$\mathbb{E}[R_S(\mathbf{w}^*) - R(\mathbf{w}^*)] \leq \frac{4G_{\mathbf{v}}^2}{\rho n}.$$

We can plug the above two inequalities into (5), and get

$$\mathbb{E}[R(\mathbf{w}_T) - R^*] = \mathcal{O}(\varepsilon_T + (1 + \frac{L}{\rho})G_{\mathbf{w}} \left( \sqrt{\frac{\varepsilon_T}{2\mu}} + \frac{1}{n} \sqrt{\frac{G_{\mathbf{w}}^2}{4\mu^2} + \frac{G_{\mathbf{v}}^2}{\rho\mu}} \right) + \frac{4G_{\mathbf{v}}^2}{\rho n}).$$

Now by the choice of  $\eta_{\mathbf{w},t}, \eta_{\mathbf{v},t}$ , and Theorem 3, we have  $\varepsilon_T = \mathcal{O}(\frac{\kappa^{3.5}}{\mu^{2.5}} \frac{1/m + d(\sigma_{\mathbf{w}}^2 + \sigma_{\mathbf{v}}^2)}{T^{2/3}})$ . Assume  $m$  is a constant. Plugging  $\varepsilon_T$  into the preceding inequality and letting  $T = \mathcal{O}(n)$  yields the second statement.  $\square$

## E Additional Experimental Details

### E.1 Source Code

For the purpose of double-blind peer-review, the source code is accessible in the supplementary file.

### E.2 Computing Infrastructure Description

All algorithms are implemented in Python 3.6 and trained and tested on an Intel(R) Xeon(R) CPU W5590 @3.33GHz with 48GB of RAM and an NVIDIA Quadro RTX 6000 GPU with 24GB memory. The PyTorch version is 1.6.0.

### E.3 Description of Datasets

In experiments, we use three benchmark datasets. Specifically, ijcnn1 dataset from LIBSVM repository, MNIST dataset and Fashion-MNIST dataset are from LeCun et al. [1998], and Xiao et al. [2017]. The details of these datasets are shown in Table 3. For the ijcnn1 dataset, we normalize the features into [0,1]. For MNIST and Fashion-MNIST datasets, we first normalize the features of them into [0,1] then normalize them according to the mean and standard deviation.

| Dataset       | #Classes | #Training Samples | #Testing Samples | #Features |
|---------------|----------|-------------------|------------------|-----------|
| ijcnn1        | 2        | 39,992            | 9,998            | 22        |
| MNIST         | 10       | 60,000            | 10,000           | 784       |
| Fashion-MNIST | 10       | 60,000            | 10,000           | 784       |

Table 1: Statistical information of each dataset for AUC optimization.

### E.4 Training Settings

The training settings for NSEG and DP-SGDA on all datasets are shown in Table 2.

| Methods             | Datasets      | Batch Size | Learning Rate |              |              |              | Epochs |    | Projection Size |     |
|---------------------|---------------|------------|---------------|--------------|--------------|--------------|--------|----|-----------------|-----|
|                     |               |            | Ori           |              | DP           |              | Ori    | DP | Ori             | DP  |
|                     |               |            | $\mathbf{w}$  | $\mathbf{v}$ | $\mathbf{w}$ | $\mathbf{v}$ |        |    |                 |     |
| NSEG                | ijcnn1        | 64         | 300           | 300          | 350          | 350          | 1000   | 15 | 100             | 100 |
|                     | MNIST         | 64         | 11            | 11           | 5            | 5            | 100    | 15 | 2               | 2   |
|                     | Fashion-MNIST | 64         | 11            | 11           | 5            | 5            | 100    | 15 | 3               | 3   |
| DP-SGDA<br>(Linear) | ijcnn1        | 64         | 300           | 300          | 350          | 350          | 100    | 15 | 10              | 10  |
|                     | MNIST         | 64         | 11            | 11           | 5            | 5            | 100    | 15 | 2               | 2   |
|                     | Fashion-MNIST | 64         | 11            | 11           | 5            | 5            | 100    | 15 | 3               | 3   |
| DP-SGDA<br>(MLP)    | ijcnn1        | 64         | 3000          | 3001         | 500          | 501          | 10     | 10 | 100             | 100 |
|                     | MNIST         | 64         | 900           | 1000         | 100          | 210          | 10     | 10 | 2               | 2   |
|                     | Fashion-MNIST | 64         | 900           | 1000         | 100          | 210          | 10     | 10 | 2               | 2   |

Table 2: Training settings for each model and each dataset.

### E.5 DP-SGDA for AUC Maximization

In this section, we provide details of using DP-SGDA to learn AUC maximization problem. AUC maximization with square loss can be reformulated as

$$F(\theta, a, b, \mathbf{v}) = \mathbb{E}_{\mathbf{z}}[(1-p)(h(\theta; \mathbf{x}) - a)^2 \mathbb{I}[y = 1] + p(h(\theta; \mathbf{x}) - b)^2 \mathbb{I}[y = -1] + 2(1+\mathbf{v})(ph(\theta; \mathbf{x}) \mathbb{I}[y = -1] - (1-p)h(\theta; \mathbf{x}) \mathbb{I}[y = 1])] - p(1-p)\mathbf{v}^2]$$

where  $\mathbf{z} = (\mathbf{x}, y)$  and  $p = \mathbb{P}[y = 1]$ . The empirical risk formulation is given as

$$F_S(\theta, a, b, \mathbf{v}) = \frac{1}{n} \sum_{i=1}^n \left\{ \frac{1}{n_+} (h(\theta; \mathbf{x}_i) - a)^2 \mathbb{I}[y_i = 1] + \frac{1}{n_-} (h(\theta; \mathbf{x}_i) - b)^2 \mathbb{I}[y_i = -1] + 2(1+\mathbf{v}) \left( \frac{1}{n_-} h(\theta; \mathbf{x}_i) \mathbb{I}[y_i = -1] - \frac{1}{n_+} h(\theta; \mathbf{x}_i) \mathbb{I}[y_i = 1] \right) - \frac{1}{n} \mathbf{v}^2 \right\}$$

---

**Algorithm 1** DP-SGDA for AUC Maximization

---

- 1: **Inputs:** Private dataset  $S = \{\mathbf{z}_i : i \in [n]\}$ , privacy budget  $\epsilon, \delta$ , number of iterations  $T$ , learning rates  $\{\gamma_t, \lambda_t\}_{t=1}^T$ , initial points  $(\theta_0, a_0, b_0, \mathbf{v}_0)$
- 2: Compute  $n_+ = \sum_{i=1}^n \mathbb{I}[y_i = 1]$  and  $n_- = \sum_{i=1}^n \mathbb{I}[y_i = -1]$
- 3: Compute noise parameters  $\sigma_1$  and  $\sigma_2$  based on Eq. (3)
- 4: **for**  $t = 1$  to  $T$  **do**
- 5:   Randomly select a batch  $S_t$
- 6:   For each  $j \in I_t$ , compute gradient  $\nabla_{\theta} f(\theta_t, a_t, b_t, \mathbf{v}_t; \mathbf{z}_j), \nabla_a f(\theta_t, a_t, b_t, \mathbf{v}_t; \mathbf{z}_j), \nabla_b f(\theta_t, a_t, b_t, \mathbf{v}_t; \mathbf{z}_j)$  and  $\nabla_{\mathbf{v}} f(\theta_t, a_t, b_t, \mathbf{v}_t; \mathbf{z}_j)$  based on Eq. (21)
- 7:   Sample independent noises  $\xi_t \sim \mathcal{N}(0, \sigma_1^2 I_{d+2})$  and  $\zeta_t \sim \mathcal{N}(0, \sigma_2^2)$
- 8:   Update

$$\begin{aligned} \begin{pmatrix} \theta_{t+1} \\ a_{t+1} \\ b_{t+1} \end{pmatrix} &= \Pi \left\{ \begin{pmatrix} \theta_t \\ a_t \\ b_t \end{pmatrix} - \gamma_t \left( \frac{1}{m} \sum_{j \in I_t} \begin{pmatrix} \nabla_{\theta} f(\theta_t, a_t, b_t, \mathbf{v}_t; \mathbf{z}_j) \\ \nabla_a f(\theta_t, a_t, b_t, \mathbf{v}_t; \mathbf{z}_j) \\ \nabla_b f(\theta_t, a_t, b_t, \mathbf{v}_t; \mathbf{z}_j) \end{pmatrix} + \xi_t \right) \right\} \\ \mathbf{v}_{t+1} &= \Pi \left\{ \mathbf{v}_t + \lambda_t \left( \frac{1}{m} \sum_{j \in I_t} \nabla_{\mathbf{v}} f(\theta_t, a_t, b_t, \mathbf{v}_t; \mathbf{z}_j) + \zeta_t \right) \right\} \end{aligned}$$

9: **end for**

10: **Outputs:**  $(\theta_T, a_T, b_T, \mathbf{v}_T)$  or  $(\bar{\theta}_T, \bar{a}_T, \bar{b}_T, \bar{\mathbf{v}}_T)$

---

For any subset  $S_t$  of size  $m$ , let  $I_t$  denote the set of indices in  $S_t$ , the gradients of any  $j \in I_t$  are given by

$$\begin{aligned} \nabla_{\theta} f(\theta, a, b, \mathbf{v}; \mathbf{z}_j) &= \frac{2}{n_+} (h(\theta; \mathbf{x}_j) - a) \nabla h(\theta; \mathbf{x}_j) \mathbb{I}[y_j = 1] + \frac{2}{n_-} (h(\theta; \mathbf{x}_j) - b) \nabla h(\theta; \mathbf{x}_j) \mathbb{I}[y_j = -1] \\ &\quad + 2(1 + \mathbf{v}) \left( \frac{1}{n_-} \nabla h(\theta; \mathbf{x}_j) \mathbb{I}[y_j = -1] - \frac{1}{n_+} \nabla h(\theta; \mathbf{x}_j) \mathbb{I}[y_j = 1] \right) \\ \nabla_a f(\theta, a, b, \mathbf{v}; \mathbf{z}_j) &= \frac{2}{n_+} (a - h(\theta; \mathbf{x}_j)) \mathbb{I}[y_j = 1], \quad \nabla_b f(\theta, a, b, \mathbf{v}; \mathbf{z}_j) = \frac{2}{n_-} (b - h(\theta; \mathbf{x}_j)) \mathbb{I}[y_j = -1] \\ \nabla_{\mathbf{v}} f(\theta, a, b, \mathbf{v}; \mathbf{z}_j) &= 2 \left( \frac{1}{n_-} h(\theta; \mathbf{x}_j) \mathbb{I}[y_j = -1] - \frac{1}{n_+} h(\theta; \mathbf{x}_j) \mathbb{I}[y_j = 1] \right) - \frac{2}{n} \mathbf{v} \end{aligned} \tag{21}$$

The pseudo-code can be found in Algorithm 1.

## F Additional Experimental Results

We show the details of NSEG and DP-SGDA (Linear and MLP settings) performance with using five different  $\epsilon \in \{0.1, 0.5, 1, 5, 10\}$  and three different  $\delta \in \{1e-4, 1e-5, 1e-6\}$  in Table 3. From Table 3, we can find that the performance will be decreased when decrease the value of  $\delta$  in the same  $\epsilon$  settings. The reason is that the small  $\delta$  is corresponding to a large value of  $\sigma$  based on Theorem 1. A large  $\sigma$  means a large noise will be added to the gradients during the training updates. Therefore, the AUC performance will be decreased as  $\delta$  decreasing. On the other hand, we can find that our DP-SGDA(Linear) outperforms NSEG under the same settings. This is because the NSEG method will add a larger noise than DP-SGDA into the gradients in the training and we have discussed this detail in the Section 4.2.

We also compare the  $\sigma$  values from NSEG and DP-SGDA methods on all datasets in Figure 1 (a) with setting  $\delta=1e-5$  and (b)  $\delta=1e-4$ . From the figure, it is clear that the  $\sigma$  from NSEG is larger than ours in all  $\epsilon$  settings. This implies the noise generated from NSEG is also larger than ours.

## References

Martin Abadi, Andy Chu, Ian Goodfellow, H Brendan McMahan, Ilya Mironov, Kunal Talwar, and Li Zhang. Deep learning with differential privacy. In *Proceedings of the 2016 ACM SIGSAC conference on computer*

| Dataset       | ijcnn1         |         |         | MNIST  |         |         | Fashion-MNIST |         |         |        |
|---------------|----------------|---------|---------|--------|---------|---------|---------------|---------|---------|--------|
| Algorithm     | Linear         |         | MLP     | Linear |         | MLP     | Linear        |         | MLP     |        |
|               | NSEG           | DP-SGDA | DP-SGDA | NSEG   | DP-SGDA | DP-SGDA | NSEG          | DP-SGDA | DP-SGDA |        |
| Original      | 92.191         | 92.448  | 96.609  | 93.306 | 93.349  | 99.546  | 96.552        | 96.523  | 98.020  |        |
| $\delta=1e-4$ | $\epsilon=0.1$ | 90.231  | 91.229  | 94.020 | 91.285  | 91.962  | 98.300        | 95.490  | 95.637  | 96.312 |
|               | $\epsilon=0.5$ | 90.352  | 91.366  | 96.108 | 91.328  | 92.067  | 98.703        | 95.533  | 95.829  | 97.098 |
|               | $\epsilon=1$   | 90.358  | 91.376  | 96.316 | 91.331  | 92.073  | 98.722        | 95.536  | 95.840  | 97.143 |
|               | $\epsilon=5$   | 90.363  | 91.385  | 96.326 | 91.334  | 92.079  | 98.746        | 95.539  | 95.849  | 97.208 |
|               | $\epsilon=10$  | 90.363  | 91.387  | 96.329 | 91.335  | 92.080  | 98.750        | 95.539  | 95.850  | 97.219 |
| $\delta=1e-5$ | $\epsilon=0.1$ | 90.168  | 91.169  | 93.274 | 91.266  | 91.910  | 98.092        | 95.468  | 95.535  | 95.989 |
|               | $\epsilon=0.5$ | 90.349  | 91.362  | 96.029 | 91.326  | 92.063  | 98.675        | 95.531  | 95.823  | 97.031 |
|               | $\epsilon=1$   | 90.357  | 91.373  | 96.209 | 91.330  | 92.071  | 98.714        | 95.535  | 95.837  | 97.122 |
|               | $\epsilon=5$   | 90.363  | 91.384  | 96.300 | 91.334  | 92.079  | 98.743        | 95.538  | 95.848  | 97.200 |
|               | $\epsilon=10$  | 90.363  | 91.386  | 96.301 | 91.334  | 92.080  | 98.747        | 95.539  | 95.850  | 97.213 |
| $\delta=1e-6$ | $\epsilon=0.1$ | 90.106  | 91.110  | 92.763 | 91.247  | 91.858  | 97.878        | 95.446  | 95.468  | 95.692 |
|               | $\epsilon=0.5$ | 90.346  | 91.357  | 95.840 | 91.324  | 92.058  | 98.656        | 95.530  | 95.816  | 96.988 |
|               | $\epsilon=1$   | 90.355  | 91.371  | 96.167 | 91.330  | 92.070  | 98.705        | 95.534  | 95.834  | 97.102 |
|               | $\epsilon=5$   | 90.363  | 91.383  | 96.294 | 91.334  | 92.078  | 98.742        | 95.538  | 95.848  | 97.198 |
|               | $\epsilon=10$  | 90.363  | 91.386  | 96.297 | 91.334  | 92.080  | 98.747        | 95.539  | 95.850  | 97.213 |

Table 3: Comparison of AUC performance in NSEG and DP-SGDA (Linear and MLP settings) on three datasets with different  $\epsilon$  and different  $\delta$ . The “Original” means no noise ( $\epsilon = \infty$ ) is added in the algorithms.

and communications security, pages 308–318, 2016.

Martin Arjovsky, Soumith Chintala, and Léon Bottou. Wasserstein generative adversarial networks. In *ICML*, pages 214–223. PMLR, 2017.

Brett K Beaulieu-Jones, Zhiwei Steven Wu, Chris Williams, Ran Lee, Sanjeev P Bhavnani, James Brian Byrd, and Casey S Greene. Privacy-preserving generative deep neural networks support clinical data sharing. *Circulation: Cardiovascular Quality and Outcomes*, 12(7):e005122, 2019.

Ian Goodfellow, Jean Pouget-Abadie, Mehdi Mirza, Bing Xu, David Warde-Farley, Sherjil Ozair, Aaron Courville, and Yoshua Bengio. Generative adversarial nets. *Advances in neural information processing systems*, 27, 2014.

James Jordon, Jinsung Yoon, and Mihaela Van Der Schaar. Pate-gan: Generating synthetic data with differential privacy guarantees. In *ICLR*, 2018.

Hamed Karimi, Julie Nutini, and Mark Schmidt. Linear convergence of gradient and proximal-gradient methods under the polyak-łojasiewicz condition. In *Joint European Conference on Machine Learning and Knowledge Discovery in Databases*, pages 795–811. Springer, 2016.

Yann LeCun, Léon Bottou, Yoshua Bengio, and Patrick Haffner. Gradient-based learning applied to document recognition. *Proceedings of the IEEE*, 86(11):2278–2324, 1998.

Yunwen Lei, Zhenhuan Yang, Tianbao Yang, and Yiming Ying. Stability and generalization of stochastic gradient methods for minimax problems. In *ICML*, 2021.

Tian Li, Maziar Sanjabi, Ahmad Beirami, and Virginia Smith. Fair resource allocation in federated learning. *arXiv preprint arXiv:1905.10497*, 2019.

Tianyi Lin, Chi Jin, and Michael Jordan. On gradient descent ascent for nonconvex-concave minimax problems. In *ICML*, pages 6083–6093. PMLR, 2020.

Mingrui Liu, Zhuoning Yuan, Yiming Ying, and Tianbao Yang. Stochastic auc maximization with deep neural networks. In *ICLR*, 2020.

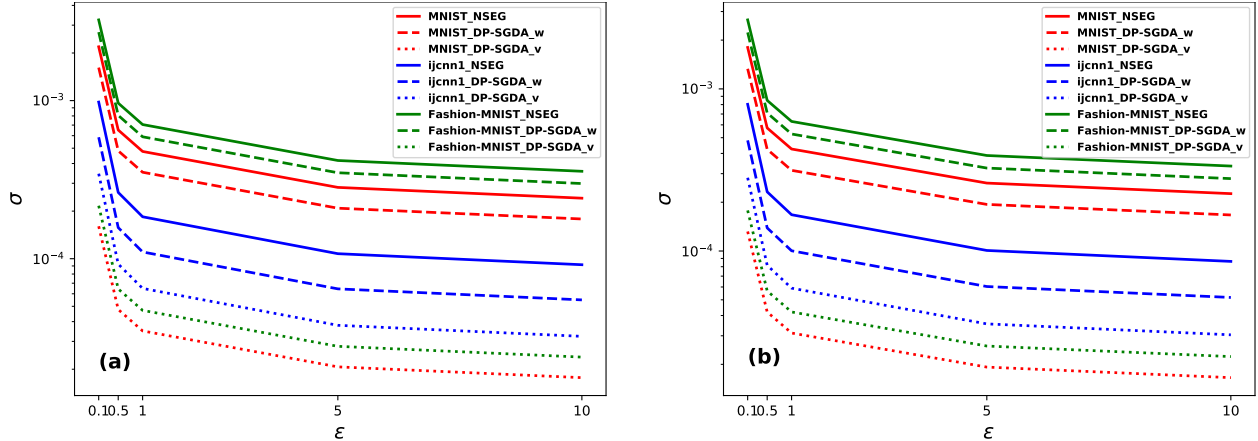

Figure 1: Comparison of  $\sigma$  in NSEG and DP-SGDA (with Linear setting) on three datasets with different  $\epsilon$  and (a)  $\delta=1e-5$  and (b)  $\delta=1e-4$ .

Mehryar Mohri, Gary Sivek, and Ananda Theertha Suresh. Agnostic federated learning. In *International Conference on Machine Learning*, pages 4615–4625. PMLR, 2019.

Arkadi Nemirovski, Anatoli Juditsky, Guanghui Lan, and Alexander Shapiro. Robust stochastic approximation approach to stochastic programming. *SIAM Journal on optimization*, 19(4):1574–1609, 2009.

Martin L Puterman. *Markov decision processes: discrete stochastic dynamic programming*. John Wiley & Sons, 2014.

R Tyrrell Rockafellar. Monotone operators and the proximal point algorithm. *SIAM journal on control and optimization*, 14(5):877–898, 1976.

Arda Sahiner, Tolga Ergen, Batu Ozturkler, Burak Bartan, John Pauly, Morteza Mardani, and Mert Pilanci. Hidden convexity of wasserstein gans: Interpretable generative models with closed-form solutions. *arXiv preprint arXiv:2107.05680*, 2021.

Shai Shalev-Shwartz, Ohad Shamir, Nathan Srebro, and Karthik Sridharan. Stochastic convex optimization. In *COLT*, 2009.

Mengdi Wang. Primal-dual  $\pi$  learning: Sample complexity and sublinear run time for ergodic markov decision problems. *arXiv preprint arXiv:1710.06100*, 2017.

Puyu Wang, Zhenhuan Yang, Yunwen Lei, Yiming Ying, and Hai Zhang. Differentially private empirical risk minimization for auc maximization. *Neurocomputing*, 461:419–437, 2021.

Yu-Xiang Wang, Borja Balle, and Shiva Prasad Kasiviswanathan. Subsampled rényi differential privacy and analytical moments accountant. In *The 22nd International Conference on Artificial Intelligence and Statistics*, pages 1226–1235. PMLR, 2019.

Han Xiao, Kashif Rasul, and Roland Vollgraf. Fashion-mnist: a novel image dataset for benchmarking machine learning algorithms. *arXiv preprint arXiv:1708.07747*, 2017.

Liyang Xie, Kaixiang Lin, Shu Wang, Fei Wang, and Jiayu Zhou. Differentially private generative adversarial network. *arXiv preprint arXiv:1802.06739*, 2018.

Yiming Ying, Longyin Wen, and Siwei Lyu. Stochastic online auc maximization. *Advances in neural information processing systems*, 29, 2016.

Junyu Zhang, Mingyi Hong, Mengdi Wang, and Shuzhong Zhang. Generalization bounds for stochastic saddle point problems. In *International Conference on Artificial Intelligence and Statistics*, pages 568–576. PMLR, 2021.
